# Supplementary material for: A modular synthesis of dithiocarbamate pendant unnatural α-amino acids
Source: Royal Society of Chemistry journal article supplement (doi:10.1039/c2cc32894a), 2012-01-01

# A modular synthesis of dithiocarbamate pendant unnatural $\alpha$ - amino acids

Amit Saha<sup>#</sup>, R. B. Nasir Baig<sup>#</sup>, John Leazer, and Rajender S. Varma\*

Sustainable Technology Division *National Risk Management Research Laboratory, Environmental Protection Agency* U.S. EPA, 26 West M.L.K. Dr. MS 443, Cincinnati, Ohio 45268, USA  
E-mail: [varma.rajender@epa.gov](mailto:varma.rajender@epa.gov)

<sup>#</sup>These authors contributed equally.

## Supporting Information

### Table of Contents

|                                                              |                   |
|--------------------------------------------------------------|-------------------|
| Experimental Procedures and data                             | Page Number 1-12  |
| <sup>1</sup> H, and <sup>13</sup> C NMR spectra of compounds | Page Number 13-52 |

## General Methods.

All the reactions were performed in oven dried apparatus and were stirred magnetically. Melting points and optical rotation values reported are uncorrected. Infrared spectra were recorded using an FTIR instrument, the frequencies are reported in wave numbers ( $\text{cm}^{-1}$ ).  $^1\text{H}$  and  $^{13}\text{C}$  spectra were recorded at 300 MHz and 75 MHz NMR instruments, respectively. Chemical shifts are reported in parts per million downfield from the internal reference, tetramethylsilane (TMS). Multiplicity is indicated using the following abbreviations: s (singlet), d (doublet), dd (double doublet), t (triplet), m (multiplet), bs (broad singlet). elemental analysis has been performed using Perkin Elmer instrument. References for the compound reported previously are indicated against each of them along with the characterization data.

### General Procedure for the Synthesis of *N*-Boc- and *N*-Cbz-, Sulfamidates.

Step I. A solution of SOCl<sub>2</sub> (1.2 equiv) in dry CH<sub>3</sub>CN under nitrogen was cooled to -40 °C, and then Boc-Threo-OMe (1.0 equiv) in dry CH<sub>3</sub>CN was added dropwise over 10 min and stirring continued for a further 45 min at the same temperature. Dry pyridine (4.0 equiv) was then added. The reaction mixture was further stirred for 1 h and then allowed to warm to room temperature. The reaction mixture was quenched with water and extracted with ethyl acetate. The combined organic extract was washed with water, dried over anhydrous sodium sulfate (Na<sub>2</sub>SO<sub>4</sub>), and concentrated in vacuum to afford the crude sulfamidite. This was used without further purification in the next step.

Step II. To a cooled (ice bath) solution of crude (step I) sulfamidite in MeCN was added ruthenium- (III) chloride (5 mol %) followed by NaIO<sub>4</sub> (1.2 equiv) and then water (CH<sub>3</sub>CN:H<sub>2</sub>O, 1:1). The mixture was stirred at °C for 1-3h and diluted with ether, and the phases were separated. The aqueous phase was extracted with ether. The combined organic portions were washed with NaHCO<sub>3</sub> solution and then brine. The solution was dried over anhydrous (Na<sub>2</sub>SO<sub>4</sub>) and concentrated. The crude product was purified by silica gel (100-200 mesh) column chromatography.

### Spectral Data.

**(4S,5R)-3-benzyl 4-methyl 5-methyl-1,2,3-oxathiazolidine-3,4-dicarboxylate 2,2-dioxide:** Yield 87 %  
Gummy solid; [ $\alpha$ ]<sub>D</sub><sup>25</sup> -30.51 (*c* = 1, CHCl<sub>3</sub>); FT-IR (cm<sup>-1</sup>), 2983, 1739, 1440, 1384, 1326, 1192, 1074, 1018, 751; <sup>1</sup>H NMR (300 MHz, CDCl<sub>3</sub>),  $\delta$  7.61 (5H, m), 5.37 (1H, d, *J* = 12 Hz), 5.35-5.25 (1H, m), 4.95-4.87 (1H, m), 4.55 (1H, d, *J* = 6 Hz), 3.75 (3H, s), 1.70 (3H, d, *J* = 6Hz); <sup>13</sup>C NMR (75 MHz, CDCl<sub>3</sub>),  $\delta$  166.5, 149.3, 134.1, 128.6, 128.5, 127.9, 77.8, 69.6, 63.7, 53.7, 18.8; Analysis calculated for C<sub>13</sub>H<sub>15</sub>NO<sub>7</sub>S: C, 47.41; H, 4.59; N, 4.25; O, 34.01; S, 9.74; Found C, 47.39; H, 4.57; N, 4.27; O, 34.04; S, 9.72.

**(S)-3-benzyl 4-methyl 1,2,3-oxathiazolidine-3,4-dicarboxylate 2,2-dioxide:** Yield 84%; Gummy solid; FT-IR (cm<sup>-1</sup>), 2981, 1736, 1442, 1377, 1259, 1187, 1150, 789, 784, 691, 657; <sup>1</sup>H NMR (400 MHz, CDCl<sub>3</sub>),  $\delta$  7.42-7.27(5H, m), 5.40 (1H, d, *J* = 9 Hz), 5.32 (1H, d, *J* = 9 Hz), 4.89-4.73(3H, m), 3.82 (3H, s) <sup>13</sup>C NMR (100 MHz, CDCl<sub>3</sub>),  $\delta$  167.1, 149.3, 134.2, 128.78, 128.71, 128.0, 69.8, 67.9, 57.7, 53.7; Analysis calculated for C<sub>12</sub>H<sub>13</sub>NO<sub>7</sub>S: C, 45.71; H, 4.16; N, 4.44; O, 35.52; S, 10.17; Found C, 45.73; H, 4.15; N, 4.41; O, 35.54; S, 10.15.

**(S)-tert-butyl 4-benzyl-1,2,3-oxathiazolidine-3-carboxylate 2,2-dioxide:** Yield (87%) white solid; mp- 138°C;  $[\alpha]_D^{25}$  -41.2 ( $c = 0.7\%$ ,  $\text{CHCl}_3$ ); FT-IR ( $\text{cm}^{-1}$ ), 2973, 2927, 1712, 1458, 1320, 1261, 1184, 1150, 1023, 838, 799, 784, 695, 657, 540;  $^1\text{H}$  NMR (300 MHz,  $\text{CDCl}_3$ )  $\delta$  1.55 (9H, s), 2.92 (1H, dd,  $J = 9.9, 13.5$ ), 3.36 (1H, dd,  $J = 3.3, 13.5$ ), 4.28-4.34 (1H, m), 4.40-4.48 (2H, m), 7.21-7.37 (5H, m); (75 MHz,  $\text{CDCl}_3$ )  $\delta$  27.9, 37.8, 58.5, 68.7, 85.5, 127.4, 129.0, 129.4, 135.1, 148.4. Analysis calculated for  $\text{C}_{14}\text{H}_{19}\text{NO}_5\text{S}$ : C 53.66, H 6.11, N 4.47; Found C 53.63, H 6.13, N 4.45.

**(S)-tert-butyl 4-((S)-sec-butyl)-1,2,3-oxathiazolidine-3-carboxylate 2,2-dioxide:**

Yield (91%) white solid; mp- 99°C;  $[\alpha]_D^{25}$  2.16 ( $c = 0.5\%$ ,  $\text{CHCl}_3$ ); FT-IR ( $\text{cm}^{-1}$ ), 2977, 2934, 1728, 1466, 1367, 1325, 1261, 1187, 1150, 1099, 968, 927, 826, 805, 653, 571,  $\text{cm}^{-1}$ ;  $^1\text{H}$  NMR (300 MHz,  $\text{CDCl}_3$ )  $\delta_H$  0.96-1.04 (6H, m), 1.15-1.44 (2H, m), 1.57 (9H, s), 2.03-2.12 (1H, m), 4.28-4.33 (1H, m), 4.39 (1H, dd,  $J = 2.4, 9.6$ ), 4.57 (1H, dd,  $J = 9.3, 6.6$ ); (75 MHz,  $\text{CDCl}_3$ )  $\delta$  11.7, 13.0, 25.3, 27.9, 36.1, 60.8, 66.3, 85.3, 149.0. Analysis calculated for  $\text{C}_{11}\text{H}_{21}\text{NO}_5\text{S}$ : C 47.29, H 7.58, N 5.01; Found C 47.27, H 7.55, N 5.05.

**General Experimental Procedure for the Synthesis of Dithiocarbamate Side Chain Bearing Unnatural  $\alpha$ -Amino Acids.**

Carbon disulfide (1.5 mmol) was added drop wise to a DMF (1 mL) solution of amine (1 mmol) at 0-5 °C. The mixture was stirred for 2-3 min. Sulfamidate (1 mmol) solution in DMF (1 mL) was added to the solution of dithiocarbamate at room temperature and was stirred for the required time period (TLC). The crude reaction mixture was extracted with ethyl acetate and was washed with water (three times). The organic layer was concentrated and was purified by column chromatography to obtain desired dithiocarbamate  $\alpha$ -amino acid. The product was characterized by FT-IR,  $^1\text{H}$  and  $^{13}\text{C}$  NMR spectroscopy, elemental analysis and polarimetry.

**Spectral Data.**

**(2R,3S)-methyl 2-(((benzyloxy)carbonyl)amino)-3-((piperidine-1-carbonothioyl)thio)butanoate, Table 2, Entry 1:** Colorless viscous liquid,  $[\alpha]_D^{23} = -18.2$  ( $c = 0.28$ ,  $\text{CHCl}_3$ ). FT-IR ( $\text{cm}^{-1}$ ): 603, 667, 701, 755, 892, 975, 1005, 1031, 1077, 1205, 1227, 1241, 1270, 1307, 1357, 1386, 1434, 1468, 1508, 1718,

1744, 2944, 3362, 3431.  $^1\text{H}$  NMR (300 MHz;  $\text{CDCl}_3$ )  $\delta_{\text{H}}$  1.38 (d,  $J = 7.2$  Hz, 3H), 1.67 (bs, 6H), 3.78-3.84 (m, 5H), 4.25 (bs, 2H), 4.66-4.74 (m, 1H), 4.92 (dd,  $J_1 = 9$  Hz,  $J_2 = 3.6$  Hz, 1H), 5.06-5.16 (m, 2H), 5.62 (d,  $J = 8.1$  Hz, 1H), 7.28-7.32 (m, 5H).  $^{13}\text{C}$  NMR (75 MHz,  $\text{CDCl}_3$ )  $\delta_{\text{C}}$  16.62, 24.26, 25.76 (2C), 48.84, 51.60, 52.58, 52.99, 57.48, 67.05, 128.01, 128.08 (2C), 128.46 (2C), 136.30, 155.99, 170.89, 193.44. Analysis calculated for  $\text{C}_{19}\text{H}_{26}\text{N}_2\text{O}_4\text{S}_2$ : C, 55.58; H, 6.38; N, 6.82. Found: C, 55.55; H, 6.37; N, 6.80.

**(2R,3S)-methyl 2-(((benzyloxy)carbonyl)amino)-3-((pyrrolidine-1-carbonothioyl)thio)butanoate,**  
**Table 2, Entry 2:** Colorless viscous liquid,  $[\alpha]_{\text{D}}^{23} = -18.9$  ( $c = 0.42$ ,  $\text{CHCl}_3$ ). FT-IR ( $\text{cm}^{-1}$ ): 579, 608, 670, 699, 749, 775, 869, 915, 955, 1004, 1034, 1078, 1090, 1159, 1207, 1269, 1304, 1349, 1384, 1438, 1509, 1718, 1744, 2953, 3363, 3425.  $^1\text{H}$  NMR (300 MHz;  $\text{CDCl}_3$ )  $\delta_{\text{H}}$  1.39 (d,  $J = 7.5$  Hz, 3H), 1.93-2.06 (m, 4H), 3.58 (t,  $J = 6.3$  Hz, 2H), 3.78 (s, 3H), 3.90 (t,  $J = 6.6$  Hz, 2H), 4.66-4.74 (m, 1H), 4.88 (dd,  $J_1 = 9$  Hz,  $J_2 = 3.6$  Hz, 1H), 5.07-5.16 (m, 2H), 5.65 (d,  $J = 7.8$  Hz, 1H), 7.28-7.32 (m, 5H).  $^{13}\text{C}$  NMR (75 MHz,  $\text{CDCl}_3$ )  $\delta_{\text{C}}$  16.92, 24.16, 25.95, 48.16, 50.72, 52.59, 55.07, 57.63, 67.08, 128.05, 128.09 (2C), 128.46 (2C), 136.27, 155.99, 170.81, 190.72. Analysis calculated for  $\text{C}_{18}\text{H}_{24}\text{N}_2\text{O}_4\text{S}_2$ : C, 54.52; H, 6.10; N, 7.06. Found: C, 54.53; H, 6.08; N, 7.05.

**(2R,3S)-methyl 2-(((benzyloxy)carbonyl)amino)-3-((diisopropylcarbamothioyl)thio)butanoate,**  
**Table 2, Entry 3:** Pale yellow viscous liquid,  $[\alpha]_{\text{D}}^{23} = -11.8$  ( $c = 2.00$ ,  $\text{CHCl}_3$ ). FT-IR ( $\text{cm}^{-1}$ ): 583, 697, 734, 772, 851, 913, 960, 1026, 1085, 1142, 1193, 1212, 1313, 1370, 1439, 1476, 1508, 1720, 2968, 3348.  $^1\text{H}$  NMR (300 MHz;  $\text{CDCl}_3$ )  $\delta_{\text{H}}$  1.37 (d,  $J = 7.2$  Hz, 17H), 3.78 (s, 3H), 4.79 (bs, 1H), 4.94 (dd,  $J_1 = 9$  Hz,  $J_2 = 3.6$  Hz, 1H), 5.06-5.17 (m, 2H), 5.60 (d,  $J = 8.7$  Hz, 1H), 7.30-7.35 (m, 5H).  $^{13}\text{C}$  NMR (75 MHz,  $\text{CDCl}_3$ )  $\delta_{\text{C}}$  16.18, 19.97 (4C), 47.44, 47.71, 52.54, 54.13, 57.36, 66.99, 128.00, 128.08 (2C), 128.47 (2C), 136.33, 156.00, 171.06, 198.06. Analysis calculated for  $\text{C}_{20}\text{H}_{30}\text{N}_2\text{O}_4\text{S}_2$ : C, 56.31; H, 7.09; N, 6.57. Found: C, 56.28; H, 7.08; N, 6.57.

**(2R,3S)-methyl 3-((benzylcarbamothioyl)thio)-2-(((benzyloxy)carbonyl)amino)butanoate, Table 2, Entry 4:** Colorless viscous liquid,  $[\alpha]_D^{23} = -10.3$  ( $c = 2.80$ ,  $\text{CHCl}_3$ ). FT-IR ( $\text{cm}^{-1}$ ): 632, 666, 696, 751, 795, 932, 1028, 1086, 1215, 1339, 1379, 1437, 1454, 1494, 1509, 1707, 3033, 3276.  $^1\text{H}$  NMR (300 MHz;  $\text{CDCl}_3$ )  $\delta_{\text{H}}$  1.37 (d,  $J = 7.2$  Hz, 3H), 3.76 (s, 3H), 4.59-4.67 (m, 2H), 4.85-4.98 (m, 2H), 5.09 (s, 2H), 5.66 (bs, 1H), 7.24-7.38 (m, 10H), 7.64 (bs, 1H).  $^{13}\text{C}$  NMR (75 MHz,  $\text{CDCl}_3$ )  $\delta_{\text{C}}$  16.3, 47.76, 51.16, 52.72, 57.63, 67.28, 127.58 (2C), 127.99, 128.20, 128.29 (2C), 128.52 (2C), 128.82 (2C), 136.11, 137.24, 156.15, 170.70, 196.01. Analysis calculated for  $\text{C}_{21}\text{H}_{24}\text{N}_2\text{O}_4\text{S}_2$ : C, 58.31; H, 5.59; N, 6.48. Found: C, 58.30; H, 5.60; N, 6.45.

**(2R,3S)-methyl 2-(((benzyloxy)carbonyl)amino)-3-(((S)-1-phenylethyl)carbamothioyl)thio)butanoate, Table 2, Entry 5:** Pale yellow viscous liquid,  $[\alpha]_D^{23} = -55.8$  ( $c = 2.42$ ,  $\text{CHCl}_3$ ). FT-IR ( $\text{cm}^{-1}$ ): 542, 600, 631, 697, 754, 845, 885, 913, 973, 1028, 1086, 1137, 1212, 1342, 1453, 1497, 1509, 1702, 2975, 3257.  $^1\text{H}$  NMR (300 MHz;  $\text{CDCl}_3$ )  $\delta_{\text{H}}$  1.36 (d,  $J = 7.2$  Hz, 3H), 1.60 (d,  $J = 6.6$  Hz, 3H), 3.78 (s, 3H), 4.60-4.66 (m, 1H), 4.89 (dd,  $J_1 = 8.7$  Hz,  $J_2 = 3$  Hz, 1H), 5.13 (s, 2H), 5.67-5.78 (m, 2H), 7.29-7.38 (m, 10 H), 7.57 (bs, 1H).  $^{13}\text{C}$  NMR (75 MHz,  $\text{CDCl}_3$ )  $\delta_{\text{C}}$  16.69, 20.73, 47.64, 52.70, 56.07, 57.74, 67.27, 126.53 (2C), 127.72, 128.09, 128.19 (2C), 128.52 (2C), 128.75 (2C), 136.17, 141.61, 156.12, 170.73, 194.72. Analysis calculated for  $\text{C}_{22}\text{H}_{26}\text{N}_2\text{O}_4\text{S}_2$ : C, 59.17; H, 5.87; N, 6.27. Found: C, 59.15; H, 5.85; N, 6.28.

**(R)-methyl 2-(((benzyloxy)carbonyl)amino)-3-((piperidine-1-carbonothioyl)thio)propanoate, Table 2, Entry 6:** Colorless viscous liquid,  $[\alpha]_D^{23} = +11.7$  ( $c = 0.48$ ,  $\text{CHCl}_3$ ). FT-IR ( $\text{cm}^{-1}$ ): 614, 641, 718, 850, 895, 922, 973, 1019, 1052, 1130, 1151, 1175, 1221, 1274, 1432, 1524, 1682, 1735, 2947, 3336.  $^1\text{H}$  NMR (300 MHz;  $\text{CDCl}_3$ )  $\delta_{\text{H}}$  1.69 (bs, 6H), 3.77 (s, 3H), 3.87-3.94 (m, 4H), 4.26 (bs, 2H), 4.63-4.70 (m, 1H), 5.12-5.13 (m, 2H), 5.87 (d,  $J = 7.2$  Hz, 1H), 7.28-7.36 (m, 5H).  $^{13}\text{C}$  NMR (75 MHz,  $\text{CDCl}_3$ )  $\delta_{\text{C}}$  24.22, 25.46, 25.92, 38.30, 51.64, 52.67, 53.67, 54.00, 66.97, 128.02, 128.08 (2C), 128.46 (2C), 136.33, 155.93, 170.97, 194.25. Analysis calculated for  $\text{C}_{18}\text{H}_{24}\text{N}_2\text{O}_4\text{S}_2$ : C, 54.52; H, 6.10; N, 7.06. Found: C, 54.51; H, 6.07; N, 7.03.

**(R)-methyl 2-(((benzyloxy)carbonyl)amino)-3-((pyrrolidine-1-carbonothioyl)thio)propanoate,**

**Table 2, Entry 7:** Colorless viscous liquid,  $[\alpha]_{\text{D}}^{23} = +18.7$  ( $c = 0.50$ ,  $\text{CHCl}_3$ ). FT-IR ( $\text{cm}^{-1}$ ): 545, 580, 623, 644, 699, 758, 742, 781, 799, 826, 865, 895, 919, 951, 975, 1022, 1055, 1157, 1178, 1227, 1242, 1277, 1319, 1343, 1388, 1434, 1456, 1528, 1681, 1737, 2946, 3329.  $^1\text{H}$  NMR (300 MHz;  $\text{CDCl}_3$ )  $\delta_{\text{H}}$  1.93-2.13 (m, 4H), 3.65 (t,  $J = 6.9$  Hz, 2H), 3.78 (s, 3H), 3.90-3.94 (m, 4H), 4.63-4.70 (m, 1H), 5.08-5.17 (m, 2H), 5.91 (d,  $J = 7.2$  Hz, 1H), 7.31-7.38 (m, 5H).  $^{13}\text{C}$  NMR (75 MHz,  $\text{CDCl}_3$ )  $\delta_{\text{C}}$  24.21, 26.00, 37.58, 50.77, 52.67, 54.15, 55.49, 66.96, 128.02, 128.06 (2C), 128.45 (2C), 136.36, 155.97, 170.93, 191.48. Analysis calculated for  $\text{C}_{17}\text{H}_{22}\text{N}_2\text{O}_4\text{S}_2$ : C, 53.38; H, 5.80; N, 7.32. Found: C, 53.40; H, 5.79; N, 7.33.

**(R)-methyl 2-(((benzyloxy)carbonyl)amino)-3-((diethylcarbamothioyl)thio)propanoate, Table 2,**

**Entry 8:** Colorless viscous liquid,  $[\alpha]_{\text{D}}^{23} = +24.4$  ( $c = 0.52$ ,  $\text{CHCl}_3$ ). FT-IR ( $\text{cm}^{-1}$ ): 557, 577, 666, 697, 752, 832, 916, 982, 1006, 1028, 1055, 1144, 1205, 1269, 1301, 1343, 1380, 1420, 1438, 1455, 1490, 1514, 1719, 2934, 3340.  $^1\text{H}$  NMR (300 MHz;  $\text{CDCl}_3$ )  $\delta_{\text{H}}$  1.24-1.30 (m, 6H), 3.70-3.78 (m, 5H), 3.92 (d,  $J = 6.3$  Hz, 2H), 4.02 (q,  $J = 6.9$  Hz, 2H), 4.63-4.70 (m, 1H), 5.12-5.13 (m, 2H), 5.85 (d,  $J = 7.2$  Hz, 1H), 7.35-7.37 (m, 5H).  $^{13}\text{C}$  NMR (75 MHz,  $\text{CDCl}_3$ )  $\delta_{\text{C}}$  11.48, 12.54, 38.25, 46.99, 50.19, 52.66, 54.05, 66.94, 127.99, 128.06 (2C), 128.45 (2C), 136.35, 155.93, 170.95, 194.35. Analysis calculated for  $\text{C}_{17}\text{H}_{24}\text{N}_2\text{O}_4\text{S}_2$ : C, 53.10; H, 6.29; N, 7.29. Found: C, 53.07; H, 6.29; N, 7.30.

**(S)-2-((tert-butoxycarbonyl)amino)-3-phenylpropyl pyrrolidine-1-carbodithioate, Table 2, Entry 9:**

Pale yellow solid, Mp. 157-159 °C,  $[\alpha]_{\text{D}}^{23} = +2.8$  ( $c = 0.34$ ,  $\text{CHCl}_3$ ). FT-IR ( $\text{cm}^{-1}$ ): 657, 701, 745, 833, 857, 955, 1008, 1028, 1044, 1080, 1167, 1249, 1270, 1331, 1367, 1384, 1438, 1523, 1686, 2979, 3356.  $^1\text{H}$  NMR (300 MHz;  $\text{CDCl}_3$ )  $\delta_{\text{H}}$  1.41 (s, 9H), 1.93-2.13 (m, 4H), 2.84-2.91 (m, 1H), 3.02 (bs, 1H), 3.55 (d,  $J = 6$  Hz, 2H), 3.68 (t,  $J = 6.6$  Hz, 2H), 3.94 (t,  $J = 6.9$  Hz, 2H), 4.01-4.11 (m, 1H), 5.04 (bs, 1H), 7.22-7.32 (m, 5H).  $^{13}\text{C}$  NMR (75 MHz,  $\text{CDCl}_3$ )  $\delta_{\text{C}}$  24.27, 26.02, 28.38 (3C), 39.89, 40.89, 50.73, 52.42, 55.31, 79.11, 126.47, 128.44 (2C), 129.47 (2C), 137.75, 155.45, 192.78. Analysis calculated for  $\text{C}_{19}\text{H}_{28}\text{N}_2\text{O}_2\text{S}_2$ : C, 59.96; H, 7.42; N, 7.36. Found: C, 59.97; H, 7.40; N, 7.35.

**tert-butyl ((2S,3S)-1-((diethylcarbamothioyl)thio)-3-methylpentan-2-yl)carbamate, Table 2, Entry 10:** Pale yellow solid, Mp. 104-105 °C,  $[\alpha]_{\text{D}}^{23} = -56.8$  ( $c = 0.48$ ,  $\text{CHCl}_3$ ). FT-IR ( $\text{cm}^{-1}$ ): 648, 744, 775, 835, 869, 918, 982, 1008, 1043, 1071, 1143, 1172, 1208, 1249, 1267, 1301, 1352, 1366, 1388, 1458, 1489, 1523, 1686, 2932, 2965, 3361.  $^1\text{H}$  NMR (300 MHz;  $\text{CDCl}_3$ )  $\delta_{\text{H}}$  0.92-1.00 (m, 6H), 1.06-1.24 (m, 1H), 1.30 (t,  $J = 7.2$  Hz, 6H), 1.42 (s, 9H), 1.51-1.68 (m, 2H), 3.41-3.45 (m, 1H), 3.64-3.82 (m, 4H), 3.93-3.97 (m, 1H), 4.13-4.14 (m, 1H), 4.98 (d,  $J = 8.1$  Hz, 1H).  $^{13}\text{C}$  NMR (75 MHz,  $\text{CDCl}_3$ )  $\delta_{\text{C}}$  11.58, 11.70, 12.48, 15.13, 25.37, 28.37 (3C), 38.98, 39.44, 46.82, 49.91, 55.10, 78.67, 155.92, 196.38. Analysis calculated for  $\text{C}_{16}\text{H}_{32}\text{N}_2\text{O}_2\text{S}_2$ : C, 55.13; H, 9.25; N, 8.04. Found: C, 55.10; H, 9.24; N, 8.05.

**(S)-methyl 1-((((2S,3R)-3-(((benzyloxy)carbonyl)amino)-4-methoxy-4-oxobutan-2-yl)thio)carbonothioyl)pyrrolidine-2-carboxylate, Table 3, Entry 1:** Colorless viscous liquid,  $[\alpha]_{\text{D}}^{23} = -77.4$  ( $c = 2.18$ ,  $\text{CHCl}_3$ ). FT-IR ( $\text{cm}^{-1}$ ): 561, 698, 751, 843, 888, 913, 957, 1013, 1042, 1086, 1170, 1205, 1341, 1413, 1516, 1735, 2954, 3360.  $^1\text{H}$  NMR (300 MHz;  $\text{CDCl}_3$ )  $\delta_{\text{H}}$  1.38 (d,  $J = 7.5$  Hz, 3H), 2.03-2.28 (m, 4H), 3.71-3.77 (m, 8H), 4.59-4.63 (m, 1H), 4.91 (dd,  $J_1 = 8.7$  Hz,  $J_2 = 3.3$  Hz, 1H), 5.04-5.06 (m, 1H), 5.10-5.11 (m, 2H), 5.62 (d,  $J = 6$  Hz, 1H), 7.30-7.36 (m, 5H).  $^{13}\text{C}$  NMR (75 MHz,  $\text{CDCl}_3$ )  $\delta_{\text{C}}$  16.38, 24.46, 29.03, 48.49, 50.95, 52.34, 52.62, 57.42, 66.20, 67.09, 127.98, 128.11 (2C), 128.47 (2C), 136.26, 156.03, 170.75, 171.02, 193.35. Analysis calculated for  $\text{C}_{20}\text{H}_{26}\text{N}_2\text{O}_6\text{S}_2$ : C, 52.85; H, 5.77; N, 6.16. Found: C, 52.82; H, 5.78; N, 6.18.

**(2S,4R)-methyl 1-((((2S,3R)-3-(((benzyloxy)carbonyl)amino)-4-methoxy-4-oxobutan-2-yl)thio)carbonothioyl)-4-hydroxypyrrolidine-2-carboxylate, Table 3, Entry 2:** Colorless viscous liquid,  $[\alpha]_{\text{D}}^{23} = -32.2$  ( $c = 1.68$ ,  $\text{CHCl}_3$ ). FT-IR ( $\text{cm}^{-1}$ ): 577, 667, 699, 752, 848, 897, 918, 975, 1014, 1040, 1081, 1176, 1210, 1336, 1414, 1522, 1735, 2954, 3349.  $^1\text{H}$  NMR (300 MHz;  $\text{CDCl}_3$ )  $\delta_{\text{H}}$  1.31 (d,  $J = 6$  Hz, 3H), 2.04-2.14 (m, 1H), 2.39-2.45 (m, 1H), 3.36 (bs, 1H), 3.74 (s, 3H), 3.79 (s, 3H), 3.91-3.95 (m, 1H), 4.46 (bs, 1H), 4.52-4.58 (m, 1H), 4.99 (dd,  $J_1 = 9$  Hz,  $J_2 = 3$  Hz, 1H), 5.08-5.13 (m, 3H), 5.71 (d,  $J =$

6 Hz, 1H), 7.31-7.37 (m, 5H).  $^{13}\text{C}$  NMR (75 MHz,  $\text{CDCl}_3$ )  $\delta_{\text{C}}$  14.54, 30.37, 48.40, 52.44, 52.81, 56.52, 59.18, 64.46, 67.28, 69.70, 127.83 (2C), 128.19, 128.55 (2C), 136.10, 156.55, 170.71, 171.20, 194.15. Analysis calculated for  $\text{C}_{20}\text{H}_{26}\text{N}_2\text{O}_7\text{S}_2$ : C, 51.05; H, 5.57; N, 5.95. Found: C, 51.03; H, 5.58; N, 5.93.

**(S)-1-((((2S,3R)-3-(((benzyloxy)carbonyl)amino)-4-methoxy-4-oxobutan-2-**

**yl)thio)carbonothioyl)pyrrolidine-2-carboxylic acid, Table 3, Entry 3:** Colorless viscous liquid,  $[\alpha]_{\text{D}}^{23} = -69.7$  ( $c = 1.68$ ,  $\text{CHCl}_3$ ). FT-IR ( $\text{cm}^{-1}$ ): 667, 697, 751, 795, 829, 920, 959, 1013, 1039, 1086, 1183, 1215, 1342, 1412, 1522, 1717, 2954, 3329.  $^1\text{H}$  NMR (300 MHz;  $\text{CDCl}_3$ )  $\delta_{\text{H}}$  1.38 (d,  $J = 7.2$  Hz, 3H), 2.02-2.33 (m, 4H), 3.65-3.79 (m, 5H), 4.59-4.63 (m, 1H), 4.94 (dd,  $J_1 = 8.7$  Hz,  $J_2 = 3$  Hz, 1H), 5.07-5.16 (m, 3H), 5.66 (d,  $J = 8.7$  Hz, 1H), 7.31-7.35 (m, 5H), 8.84 (bs, 1H).  $^{13}\text{C}$  NMR (75 MHz,  $\text{CDCl}_3$ )  $\delta_{\text{C}}$  16.28, 24.46, 28.94, 48.54, 50.96, 52.72, 57.36, 66.05, 67.22, 128.05, 128.15 (2C), 128.49 (2C), 136.20, 156.18, 170.84, 174.94, 193.73. Analysis calculated for  $\text{C}_{19}\text{H}_{24}\text{N}_2\text{O}_6\text{S}_2$ : C, 51.80; H, 5.49; N, 6.36. Found: C, 51.78; H, 5.48; N, 6.37.

**(5R,6S,10R)-methyl 9-benzyl-10-((S)-1-hydroxyethyl)-5-(methoxycarbonyl)-6-methyl-3-oxo-1-phenyl-8-thioxo-2-oxa-7-thia-4,9-diazaundecan-11-oate, Table 3, Entry 4:** Pale yellow viscous liquid,  $[\alpha]_{\text{D}}^{23} = +11.4$  ( $c = 1.62$ ,  $\text{CHCl}_3$ ). FT-IR ( $\text{cm}^{-1}$ ): 567, 698, 753, 771, 915, 1002, 1085, 1168, 1214, 1380, 1437, 1455, 1498, 1516, 1719, 2956, 3353.  $^1\text{H}$  NMR (300 MHz;  $\text{CDCl}_3$ )  $\delta_{\text{H}}$  1.32-1.41 (m, 6H), 3.54 (bs, 2H), 3.80 (s, 6H), 4.67-4.71 (m, 1H), 5.07-5.18 (m, 3H), 5.27-5.45 (m, 2H), 5.61 (bs, 1H), 7.28-7.42 (m, 10H).  $^{13}\text{C}$  NMR (75 MHz,  $\text{CDCl}_3$ )  $\delta_{\text{C}}$  15.87, 23.11, 49.46, 52.62, 52.74, 54.15, 56.99, 57.40, 67.32, 70.34, 128.05 (2C), 128.16 (2C), 128.29 (2C), 128.49, 128.55 (2C), 128.59, 130.16, 136.00, 156.65, 169.51, 170.94, 198.10. Analysis calculated for  $\text{C}_{26}\text{H}_{32}\text{N}_2\text{O}_7\text{S}_2$ : C, 56.92; H, 5.88; N, 5.11. Found: C, 56.90; H, 5.85; N, 5.12.

**(S)-methyl 1-((((R)-2-(((benzyloxy)carbonyl)amino)-3-methoxy-3-oxopropyl)thio)carbonothioyl)pyrrolidine-2-carboxylate, Table 3, Entry 5:** Colorless viscous liquid,  $[\alpha]_D^{23} = -56.9$  ( $c = 0.58$ ,  $\text{CHCl}_3$ ). FT-IR ( $\text{cm}^{-1}$ ): 577, 667, 699, 752, 841, 890, 914, 958, 1013, 1046, 1087, 1170, 1209, 1266, 1341, 1415, 1515, 1720, 1736, 2957, 3346.  $^1\text{H}$  NMR (300 MHz;  $\text{CDCl}_3$ )  $\delta_{\text{H}}$  2.05-2.28 (m, 4H), 3.70-3.77 (m, 7H), 3.82-4.00 (m, 3H), 4.66-4.72 (m, 1H), 5.03-5.05 (m, 1H), 5.13 (s, 2H), 5.77 (d,  $J = 7.6$  Hz, 1H), 7.33-7.37 (m, 5H).  $^{13}\text{C}$  NMR (75 MHz,  $\text{CDCl}_3$ )  $\delta_{\text{C}}$  24.52, 29.12, 38.06, 51.03, 52.35, 52.72, 53.80, 66.68, 67.07, 128.05, 128.10 (2C), 128.46 (2C), 136.29, 156.32, 170.77, 170.79, 194.00. Analysis calculated for  $\text{C}_{19}\text{H}_{24}\text{N}_2\text{O}_6\text{S}_2$ : C, 51.80; H, 5.49; N, 6.36. Found: C, 51.82; H, 5.48; N, 6.34.

**Boc-deprotection of the compound, A (entry 9, Table 2):**

Compound, A (30 mg, 0.08 mmol) was dissolved in DCM (1.5 mL). Trifluoroacetic acid (TFA) (45 mg, 0.4 mmol) was added to the solution at 0 °C followed by stirring at room temperature for 12 h. After completion of the reaction (monitored by TLC), DCM and excess of TFA were removed under vacuum.

The crude product, B obtained was directly used in the next step of peptide coupling reaction without any purification.

**Peptide coupling of B with Boc-protected (S)-phenylalanine(N-Boc(S)-Phe):**

Compound, B obtained from the previous step and *N*-Boc(*S*)-Phe (24 mg, 0.09 mmol) were dissolved in THF (2 mL). Triethylamine (32 mg, 0.32 mmol) was added to the solution. The reaction mixture was cooled to 0 °C. *N*-Hydroxybenzotriazole (HOBt) (16 mg, 0.12 mmol) and 3-(ethyliminomethyleneamino)-*N,N*-dimethyl-propan-1-amine (EDC) (18 mg, 0.12 mmol) were added drop wise to the solution followed by stirring for 1 h at 0 °C. The reaction mixture was continued to stir for 14 h at room temperature. After completion of the reaction (monitored by TLC), THF was removed under vacuum. The product was extracted using ethyl acetate and was washed with water. The organic layer was dried over anhydrous Na<sub>2</sub>SO<sub>4</sub>. The crude product was purified using column chromatography.

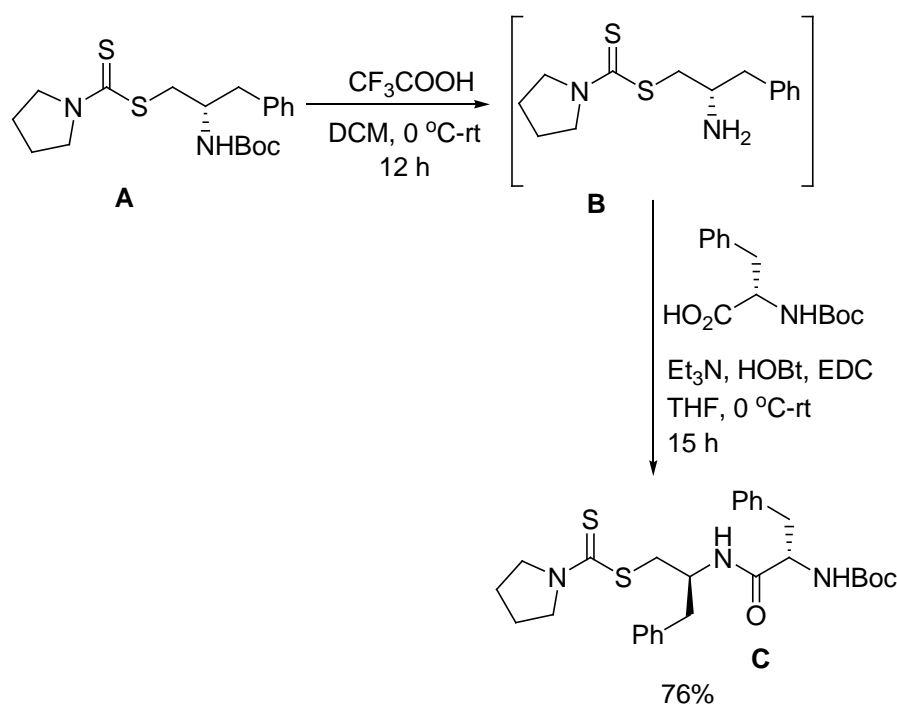

**Scheme 1** Synthesis of dithiocarbamate bearing peptide

**(S)-2-((S)-2-((tert-butoxycarbonyl)amino)-3-phenylpropanamido)-3-phenylpropyl**

**pyrrolidine-1-carbodithioate:** White solid, Mp. 164-165 °C,  $[\alpha]_D^{23} = -37.7$  ( $c = 0.38$ ,  $\text{CHCl}_3$ ). FT-IR ( $\text{cm}^{-1}$ ): 657, 701, 857, 833, 870, 955, 1008, 1044, 1154, 1167, 1249, 1270, 1438, 1523, 1687, 2930, 2979, 3349, 3356.  $^1\text{H}$  NMR (300 MHz;  $\text{CDCl}_3$ )  $\delta_{\text{H}}$  1.40 (s, 9H), 1.82-2.13 (m, 4H), 2.75-2.83 (m, 1H), 2.92-2.94 (m, 1H), 3.00-3.16 (m, 2H), 3.35 (dd,  $J_1 = 3.9$  Hz,  $J_2 = 14.4$  Hz, 1H), 3.60-3.74 (m, 3H), 3.90 (t,  $J = 6.3$  Hz, 2H), 4.22-4.35 (m, 2H), 5.01 (bs, 1H), 7.01 (d,  $J = 6.6$  Hz, 1H), 7.16-7.34 (m, 10H).  $^{13}\text{C}$  NMR (75 MHz,  $\text{CDCl}_3$ )  $\delta_{\text{C}}$  24.18, 25.95, 28.29, 38.16, 38.76, 40.80, 50.87, 52.65, 55.58, 79.70, 126.65, 126.67, 128.40, 128.55, 129.46, 129.48, 136.71, 137.38, 155.16, 171.07, 193.04. Analysis calculated for  $\text{C}_{28}\text{H}_{37}\text{N}_3\text{O}_3\text{S}_2$ : C, 63.72; H, 7.07; N, 7.96. Found: C, 63.74; H, 7.05; N, 7.93.

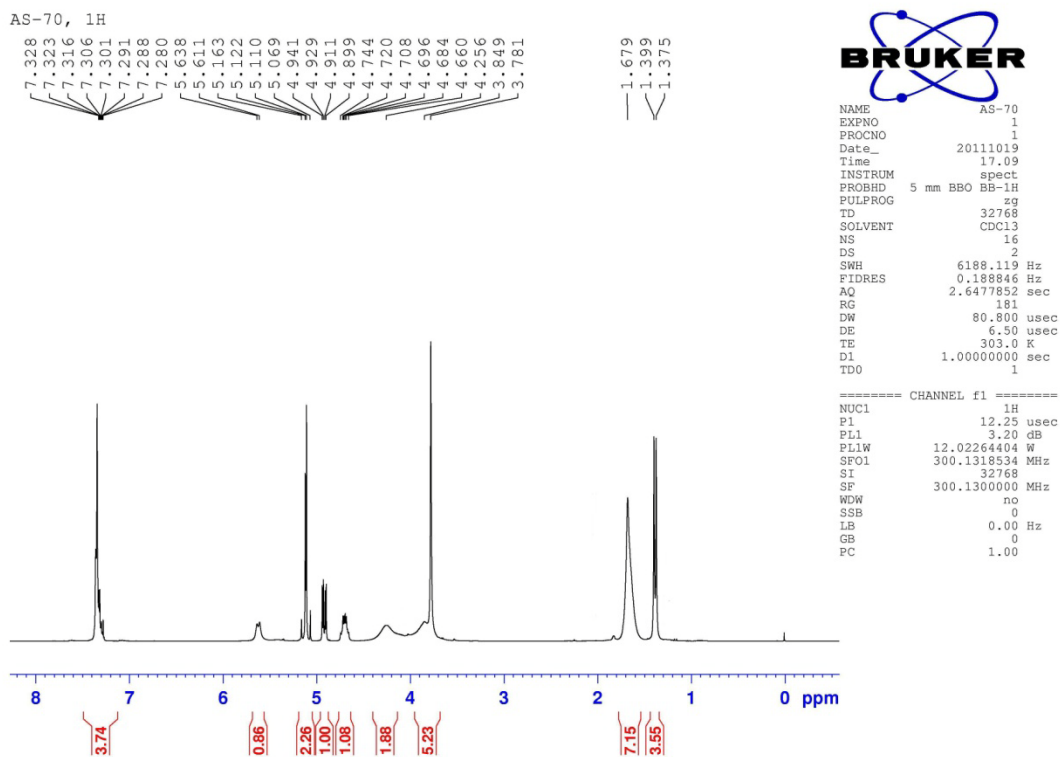

AS-70, <sup>13</sup>C

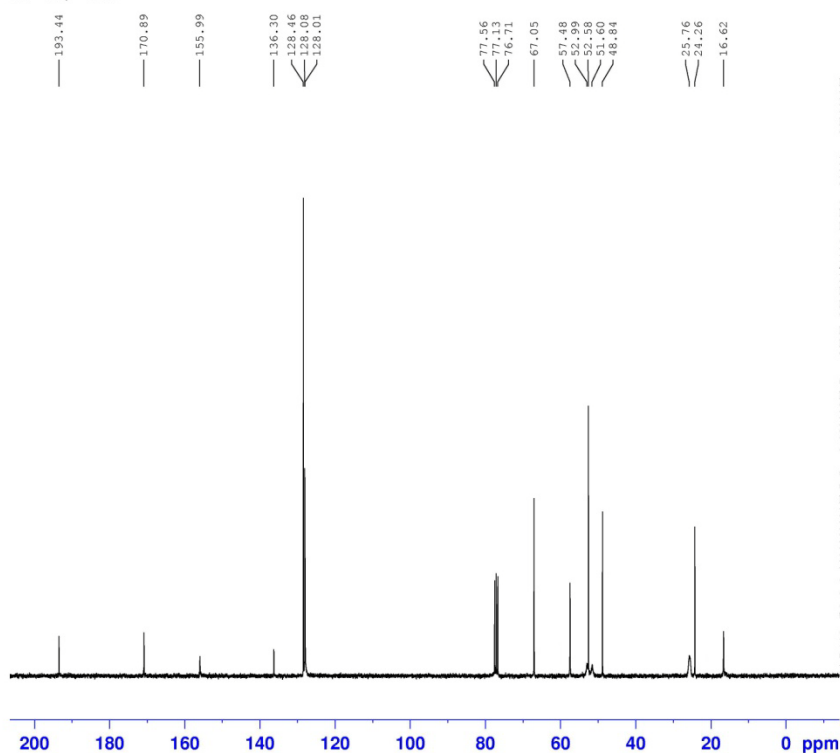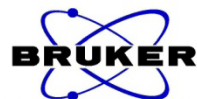

NAME AS-70  
EXPNO 2  
PROCNO 1  
Date\_ 20111019  
Time\_ 17.33  
INSTRUM spect  
PROBHD 5 mm BBO BB-1H  
PULPROG zgig  
TD 32768  
SOLVENT CDCl3  
NS 1024  
DS 4  
SWH 17985.611 Hz  
FIDRES 0.548877 Hz  
AQ 0.9110282 sec  
RG 8192  
DW 27.800 usec  
DE 6.50 usec  
TE 303.0 K  
D1 2.00000000 sec  
D11 0.03000000 sec  
TD0 1

===== CHANNEL f1 =====  
NUC1 <sup>13</sup>C  
P1 10.00 usec  
PL1 3.20 dB  
PL1W 36.06793213 W  
SFO1 75.4752953 MHz

===== CHANNEL f2 =====  
CPDPRG2 waltz16  
NUC2 <sup>1</sup>H  
PCPD2 80.00 usec  
PL2 3.20 dB  
PL12 19.50 dB  
PL2W 12.02264404 W  
PL12W 0.28183830 W  
SFO2 300.1312005 MHz  
SI 32768  
SF 75.4677490 MHz  
WDW EM  
SSB 0  
LB 1.00 Hz  
GB 0  
PC 1.40

AS-72, 1H new

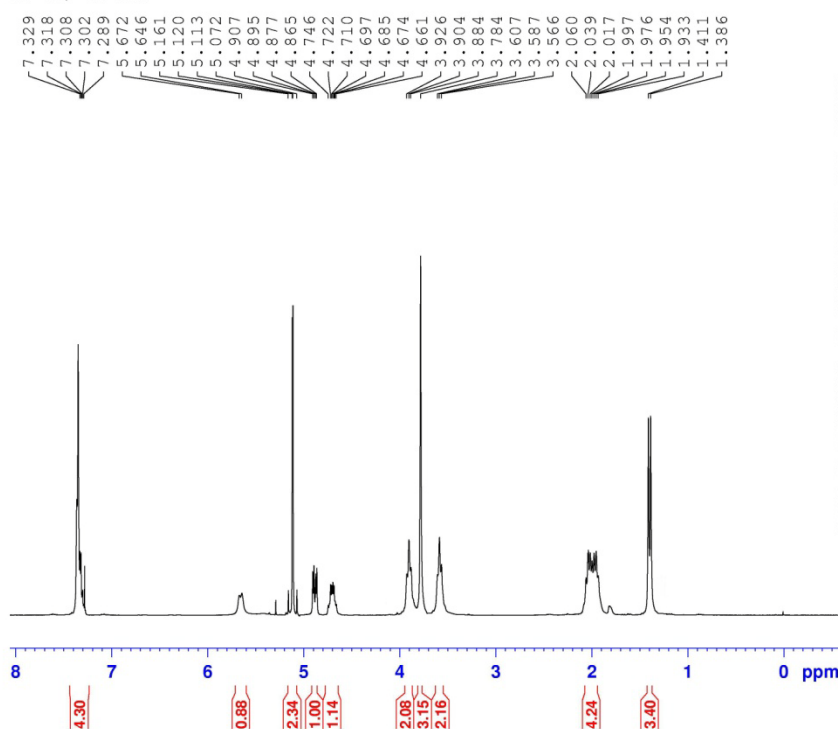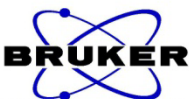

NAME AS-72  
EXPNO 2  
PROCNO 1  
Date\_ 20111028  
Time 15.50  
INSTRUM spect  
PROBHD 5 mm BBO BB-1H  
PULPROG zg  
TD 32768  
SOLVENT CDCl3  
NS 16  
DS 2  
SWH 6188.119 Hz  
FIDRES 0.188846 Hz  
AQ 2.6477852 sec  
RG 181  
DW 80.800 usec  
DE 6.50 usec  
TE 303.0 K  
D1 1.00000000 sec  
TD0 1

===== CHANNEL f1 =====  
NUC1 1H  
P1 12.25 usec  
PL1 3.20 dB  
PL1W 12.02264404 W  
SFO1 300.1318534 MHz  
SI 32768  
SF 300.1300000 MHz  
WDW no  
SSB 0  
LB 0.00 Hz  
GB 0  
PC 1.00

AS-72, 1H

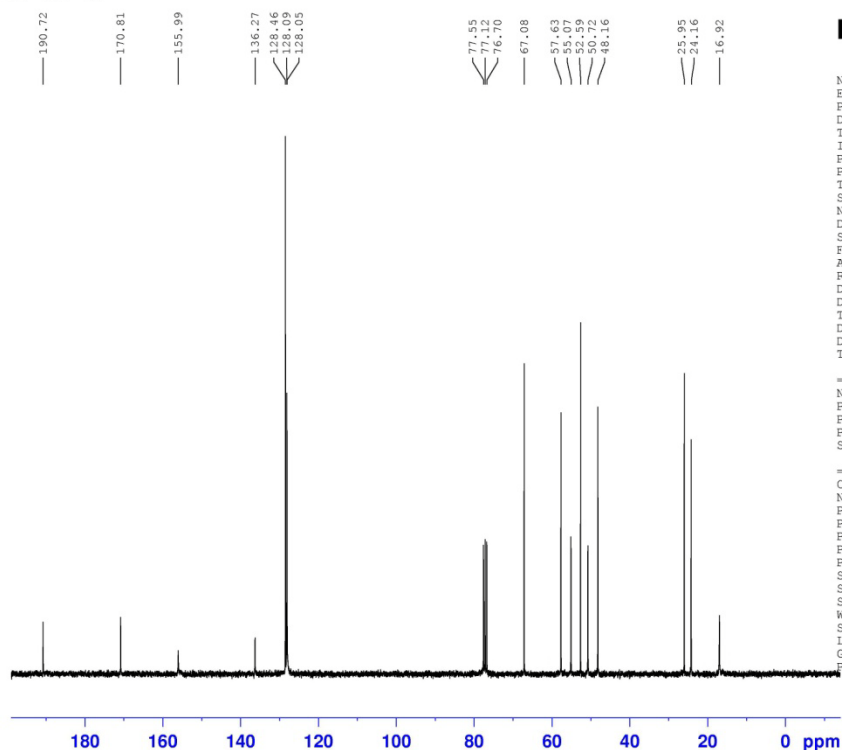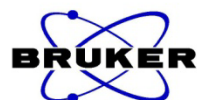

NAME AS-72  
EXPNO 1  
PROCNO 1  
Date\_ 20111028  
Time 15.35  
INSTRUM spect  
PROBHD 5 mm BBO BB-1H  
PULPROG zgig  
TD 32768  
SOLVENT CDCl3  
NS 1024  
DS 4  
SWH 17985.611 Hz  
FIDRES 0.548877 Hz  
AQ 0.9110282 sec  
RG 8192  
DW 27.800 usec  
DE 6.50 usec  
TE 303.0 K  
D1 2.0000000 sec  
D11 0.0300000 sec  
TD0 1  
===== CHANNEL f1 =====  
NUC1 13C  
P1 10.00 usec  
PL1 3.20 dB  
PL1W 36.06793213 W  
SFO1 75.4752953 MHz  
===== CHANNEL f2 =====  
CPDPRG2 waltz16  
NUC2 1H  
PCPD2 80.00 usec  
PL2 3.20 dB  
PL12 19.50 dB  
PL2W 12.02264404 W  
PL12W 0.28183830 W  
SFO2 300.1312005 MHz  
SI 32768  
SF 75.4677490 MHz  
WDW EM  
SSB 0  
LB 1.00 Hz  
GB 0  
PC 1.40

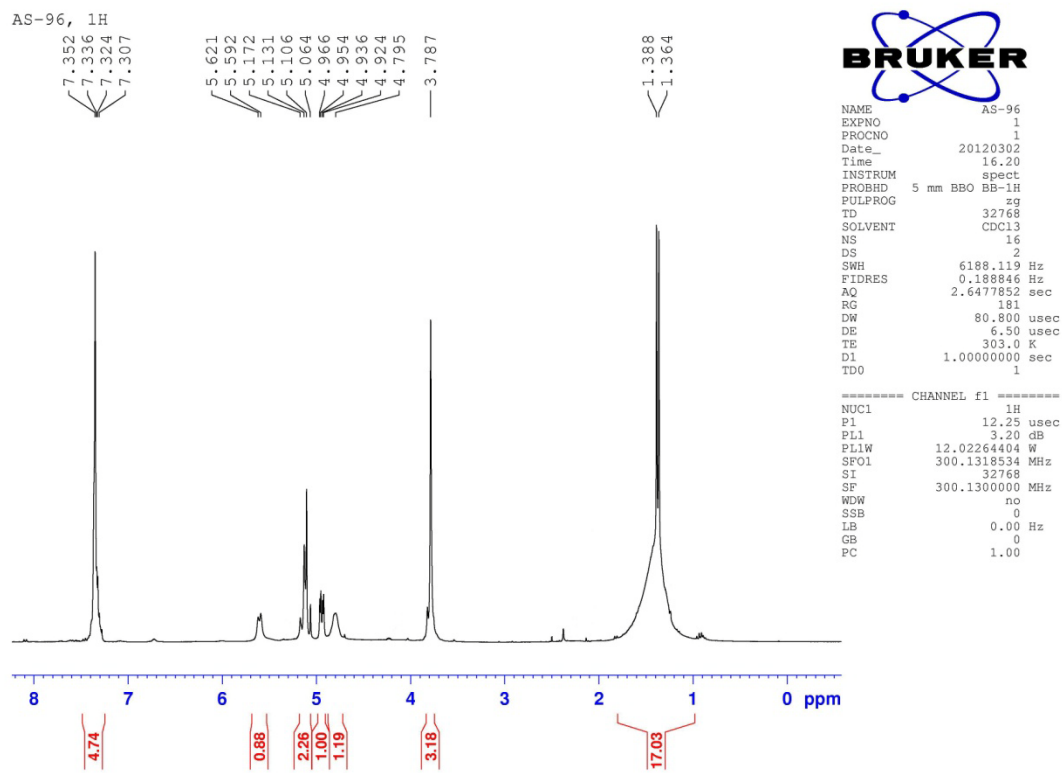

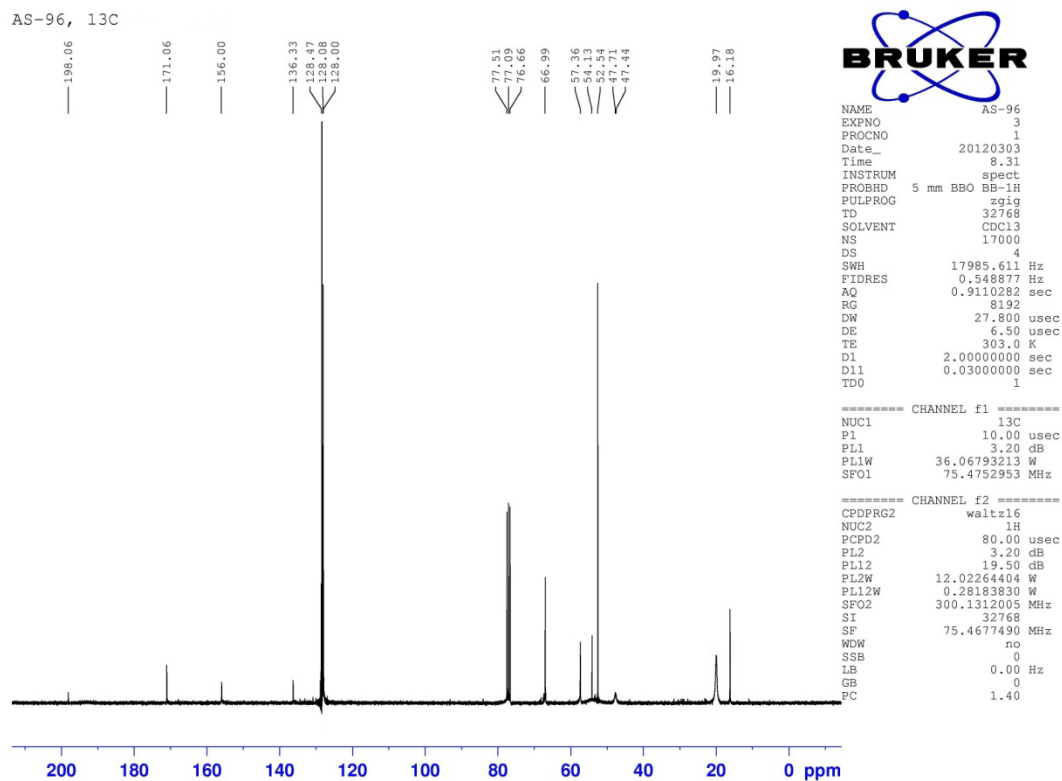

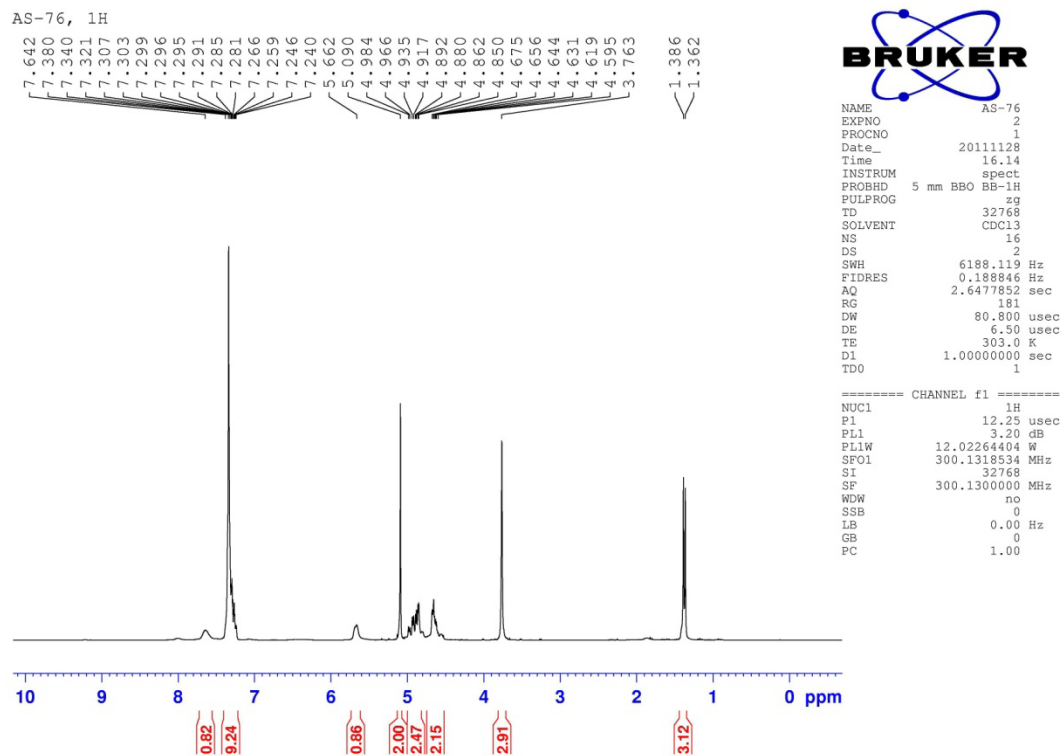

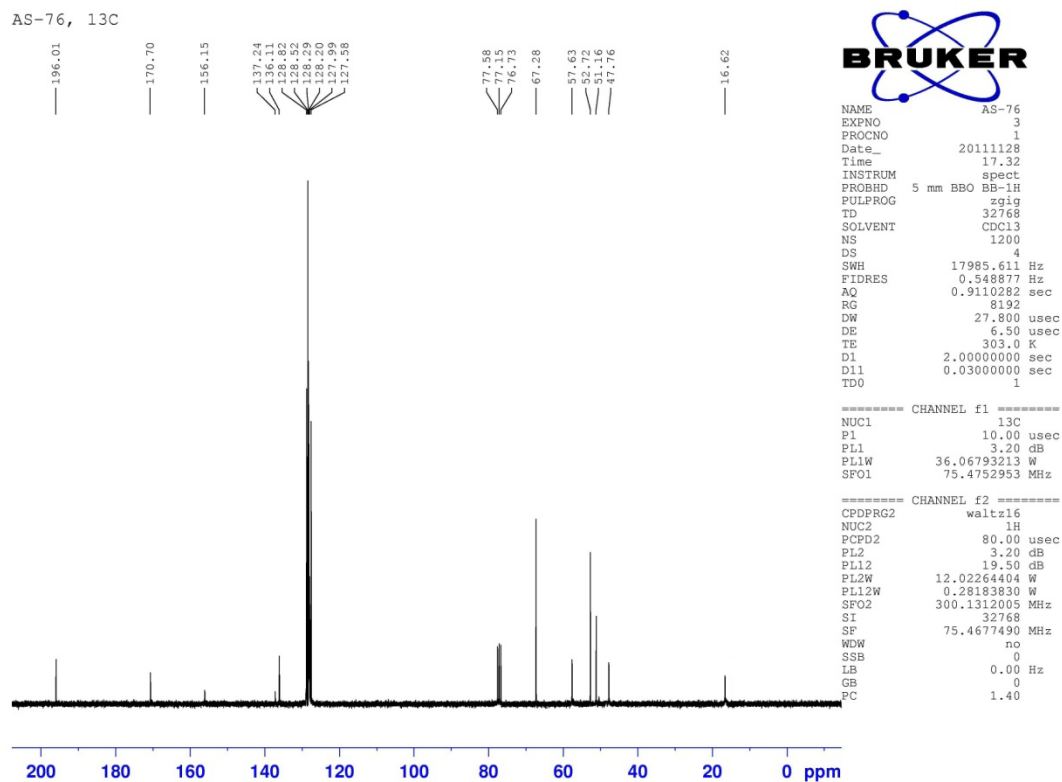

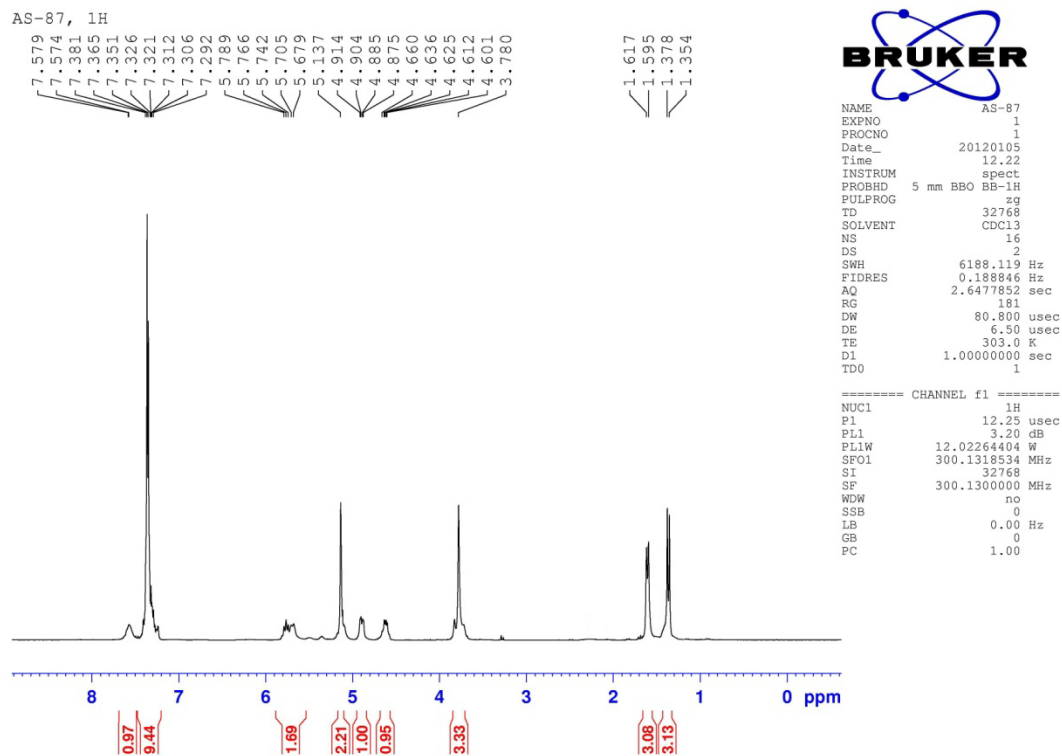

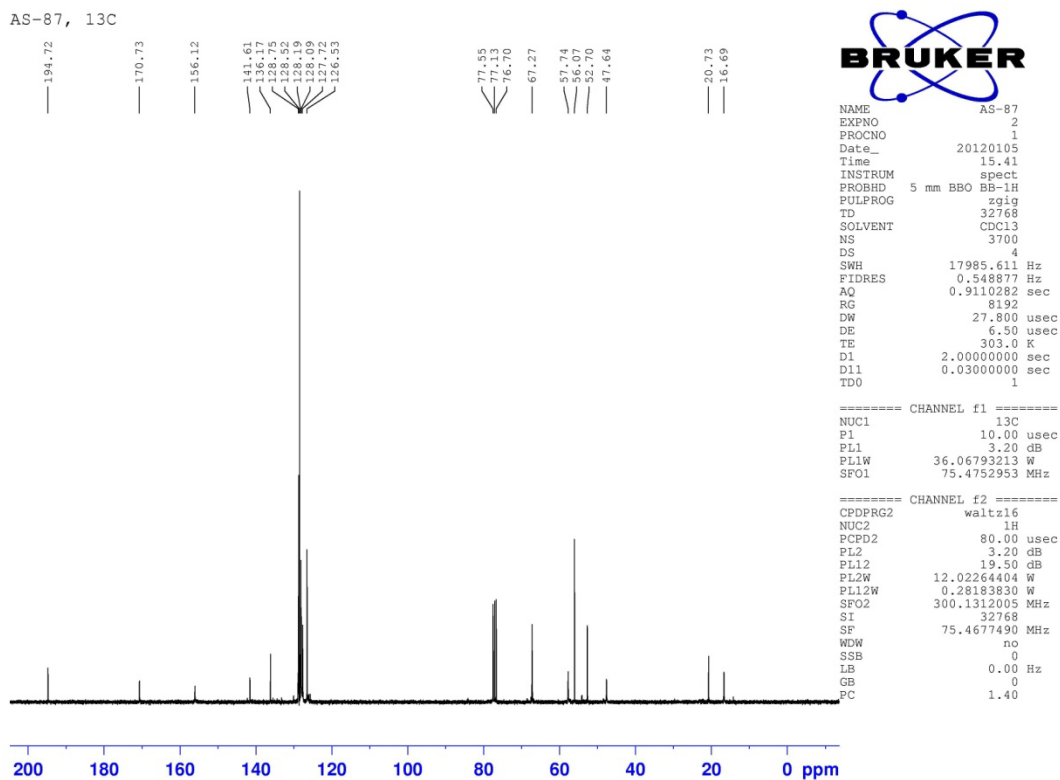

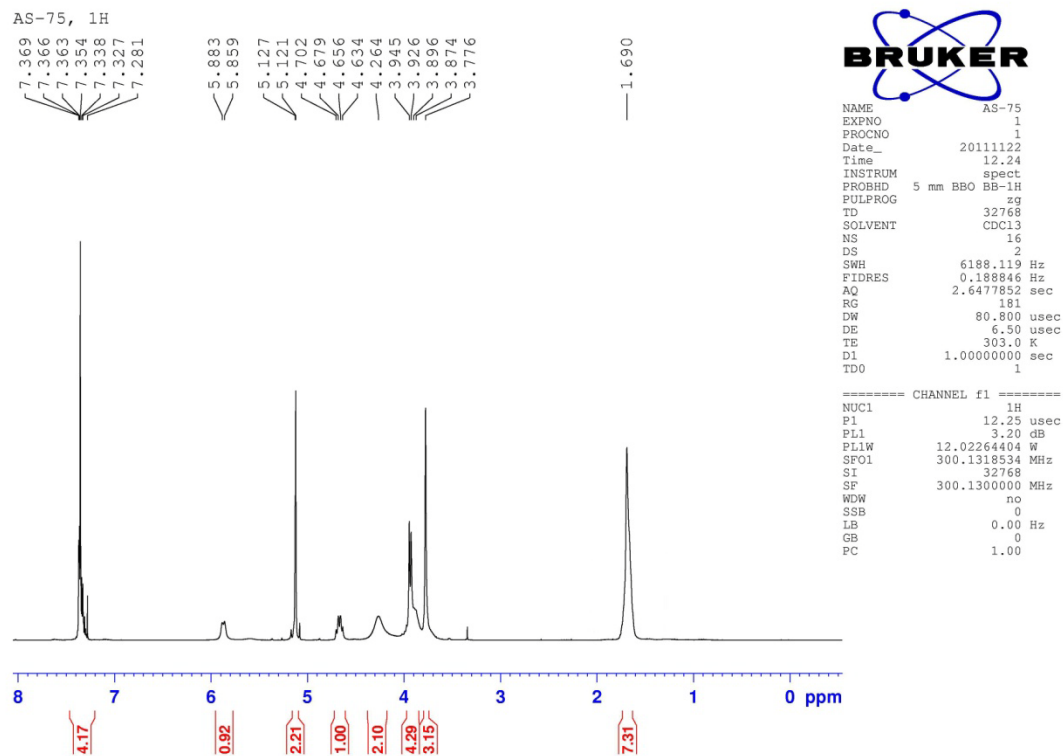

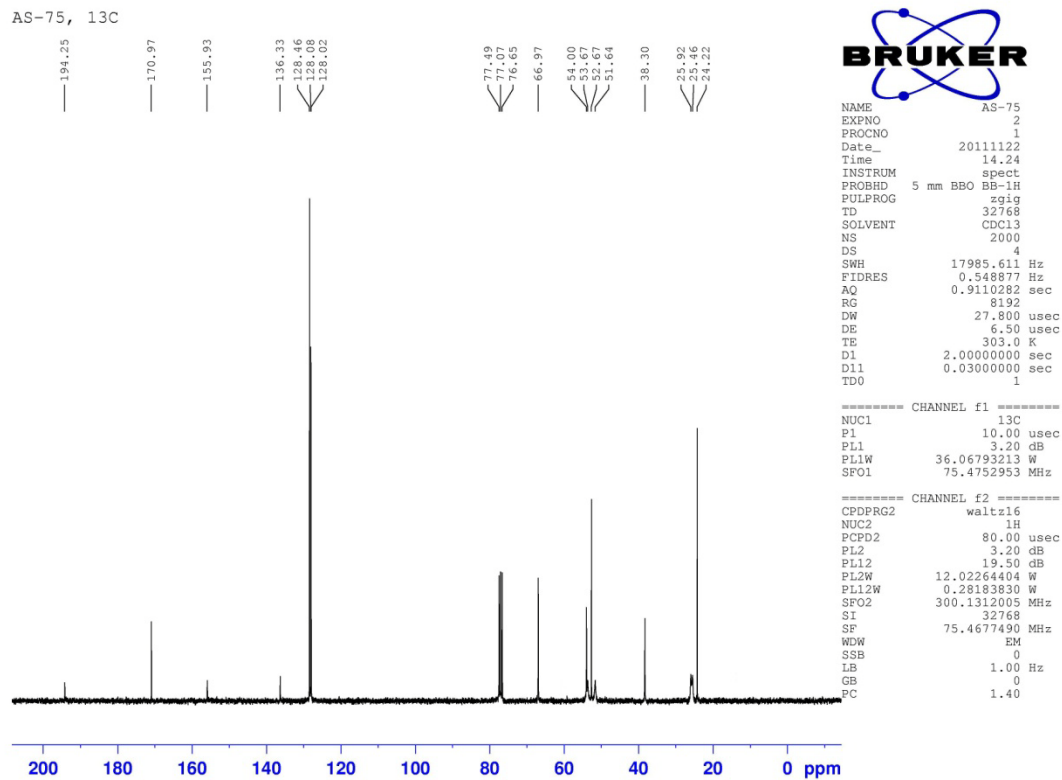

AS-86, 1H

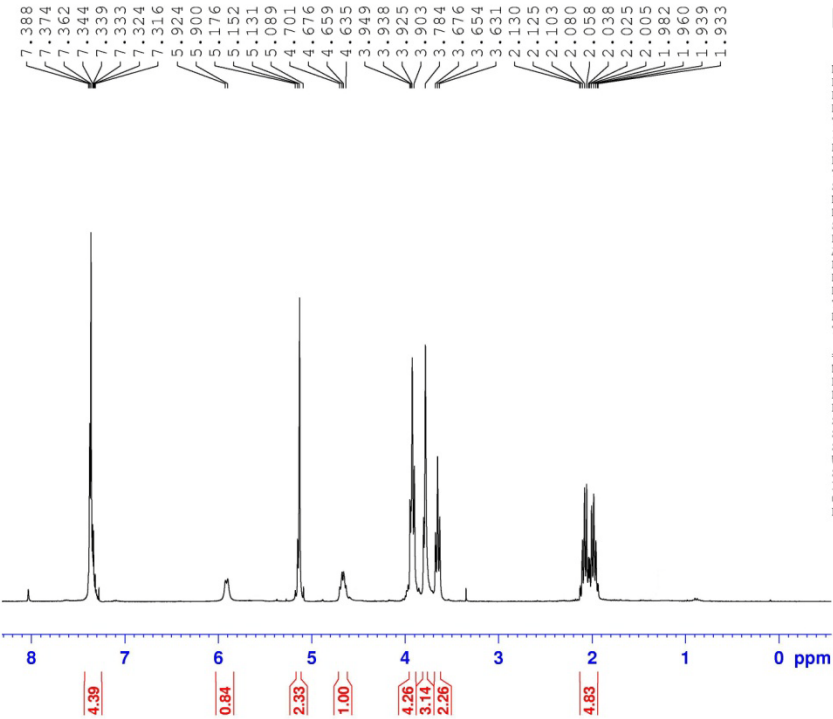

**BRUKER**

NAME AS-86  
EXPNO 1  
PROCNO 1  
Date\_ 20120104  
Time\_ 15.58  
INSTRUM spect  
PROBHD 5 mm BBO BB-1H  
PULPROG zg  
TD 32768  
SOLVENT CDCl3  
NS 16  
DS 2  
SWH 6188.119 Hz  
FIDRES 0.188846 Hz  
AQ 2.6477852 sec  
RG 181  
DW 80.800 usec  
DE 6.50 usec  
TE 303.0 K  
D1 1.00000000 sec  
TD0 1

===== CHANNEL f1 =====  
NUC1 1H  
P1 12.25 usec  
PL1 3.20 dB  
PL1W 12.02264404 W  
SFO1 300.1318534 MHz  
SI 32768  
SF 300.1300000 MHz  
WDW no  
SSB 0  
LB 0.00 Hz  
GB 0  
PC 1.00

AS-86, <sup>13</sup>C

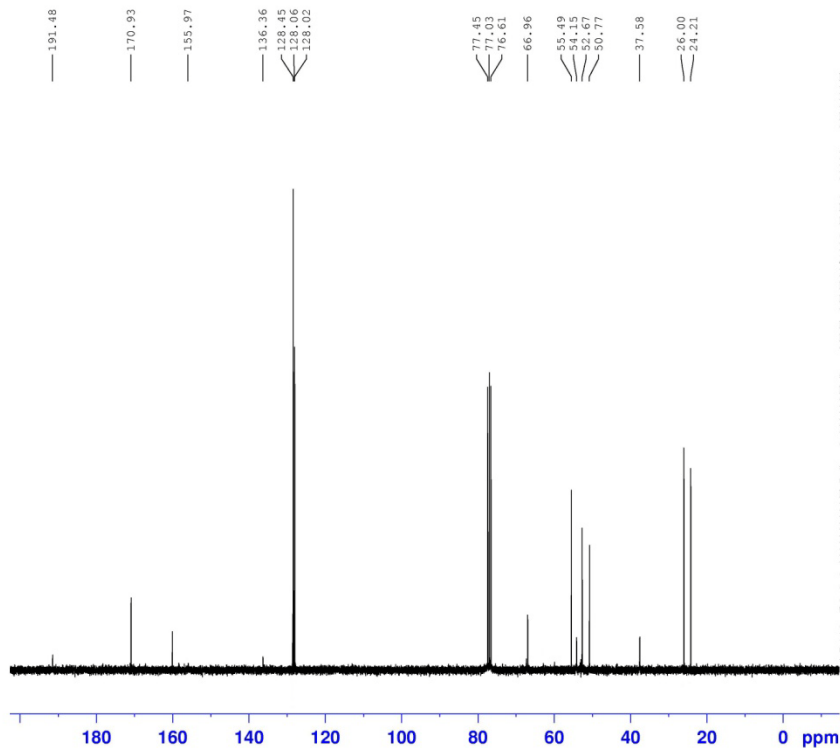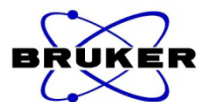

NAME AS-86  
EXPNO 2  
PROCNO 1  
Date\_ 20120104  
Time\_ 18.17  
INSTRUM spect  
PROBHD 5 mm BBO BB-1H  
PULPROG zgpg  
TD 32768  
SOLVENT CDCl3  
NS 2400  
DS 4  
SWH 17995.611 Hz  
FIDRES 0.548877 Hz  
AQ 0.9110282 sec  
RG 8192  
DW 27.800 usec  
DE 6.50 usec  
TE 303.0 K  
D1 2.00000000 sec  
D11 0.03000000 sec  
TD0 1

===== CHANNEL f1 =====  
NUC1 <sup>13</sup>C  
P1 10.00 usec  
PL1 3.20 dB  
PL1W 36.06793213 W  
SFO1 75.4752953 MHz

===== CHANNEL f2 =====  
CPDPRG2 waltz16  
NUC2 <sup>1</sup>H  
PCPD2 80.00 usec  
PL2 3.20 dB  
PL12 19.50 dB  
PL2W 12.02264404 W  
PL12W 0.28183830 W  
SFO2 300.1312005 MHz  
SI 32768  
SF 75.4677490 MHz  
WDW no  
SSB 0  
LB 0.00 Hz  
GB 0  
PC 1.40

AS-85, 1H

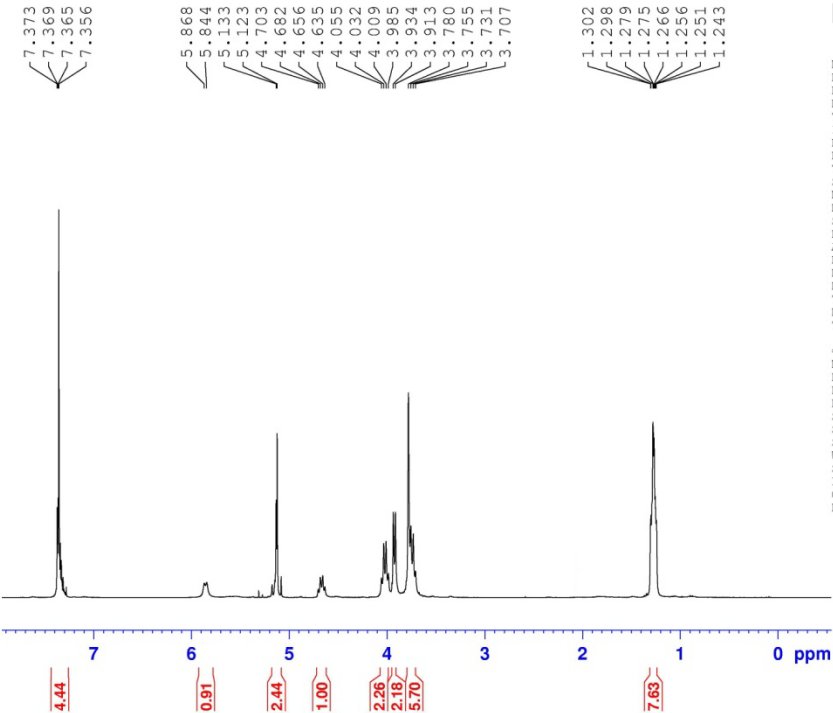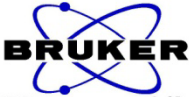

NAME AS-85  
EXPNO 1  
PROCNO 1  
Date\_ 20120104  
Time\_ 12.46  
INSTRUM spect  
PROBHD 5 mm BBO BB-1H  
PULPROG zg  
TD 32768  
SOLVENT CDCl3  
NS 16  
DS 2  
SWH 6188.119 Hz  
FIDRES 0.188846 Hz  
AQ 2.6477852 sec  
RG 181  
DW 80.800 usec  
DE 6.50 usec  
TE 303.0 K  
D1 1.00000000 sec  
TD0 1

===== CHANNEL f1 =====  
NUC1 1H  
P1 12.25 usec  
PL1 3.20 dB  
PL1W 12.02264404 W  
SFO1 300.1318534 MHz  
SI 32768  
SF 300.1300000 MHz  
WDW no  
SSB 0  
LB 0.00 Hz  
GB 0  
PC 1.00

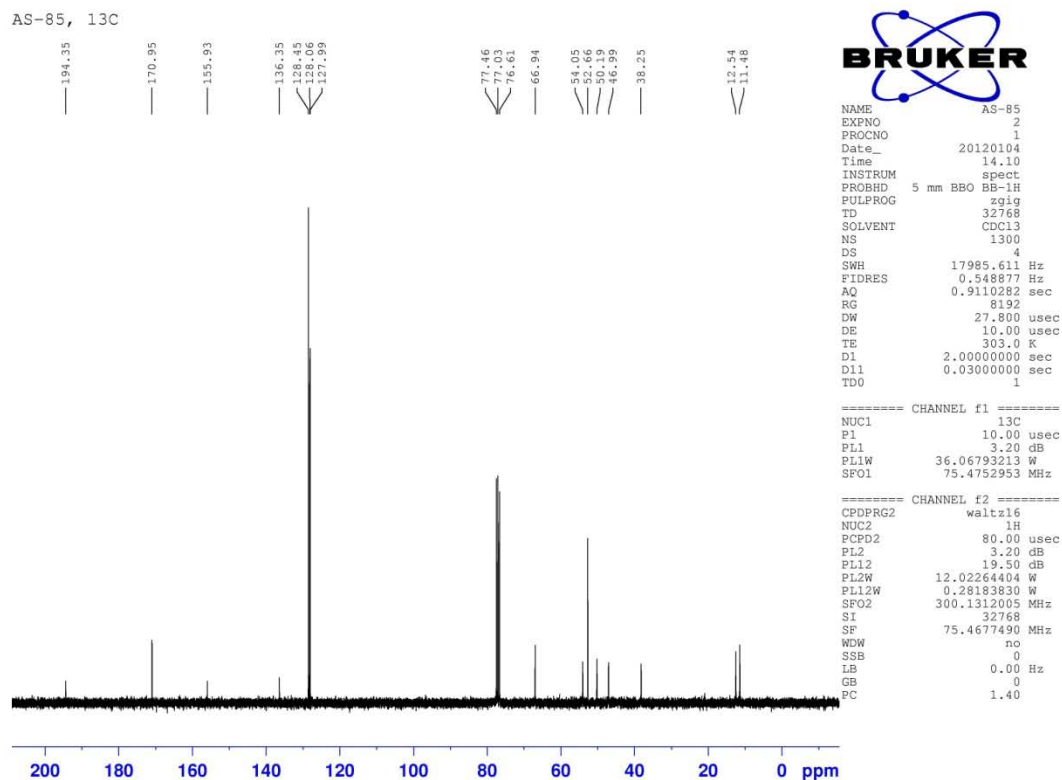

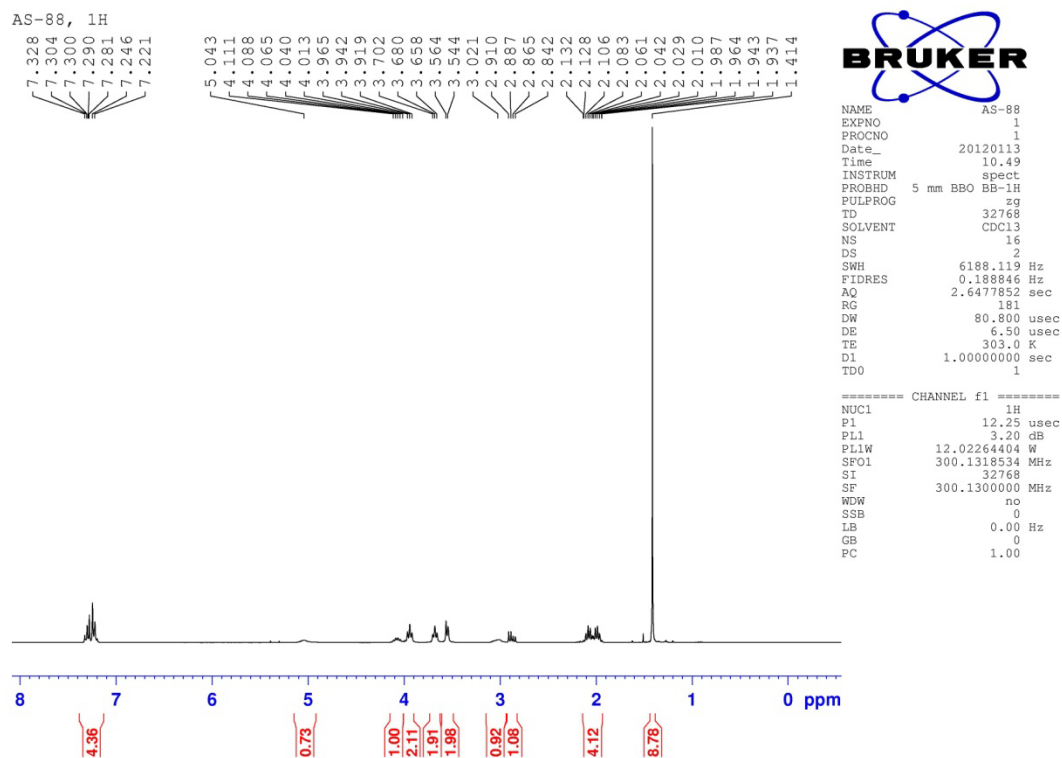

AS-88, <sup>13</sup>C

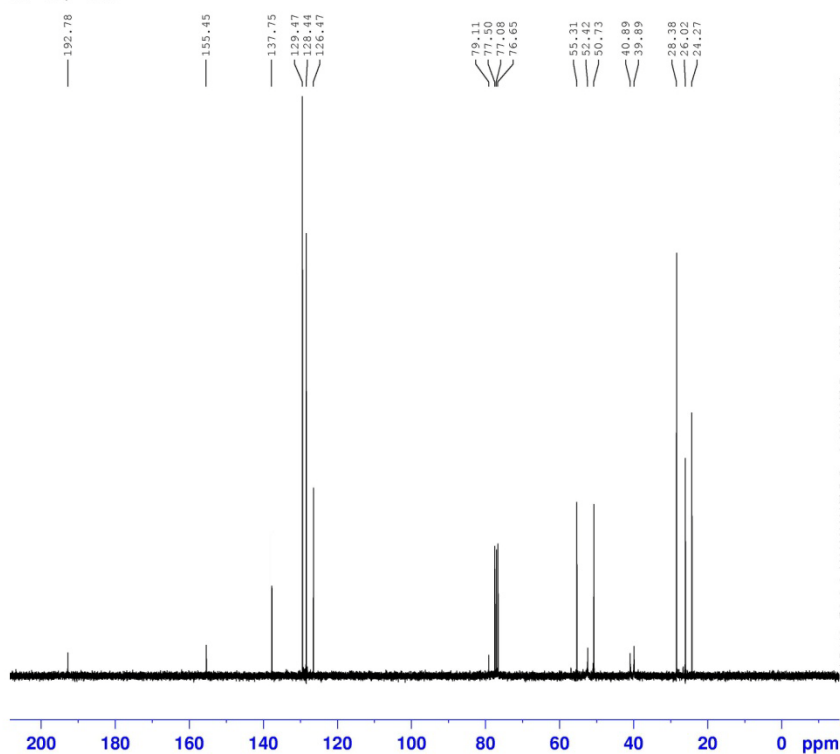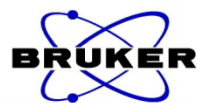

NAME AS-88  
EXPNO 2  
PROCNO 1  
Date\_ 20120113  
Time 11.45  
INSTRUM spect  
PROBHD 5 mm BBO BB-1H  
PULPROG zgig  
TD 32768  
SOLVENT CDCl3  
NS 700  
DS 4  
SWH 17985.611 Hz  
FIDRES 0.548877 Hz  
AQ 0.9110282 sec  
RG 8192  
DW 27.800 usec  
DE 10.00 usec  
TE 303.0 K  
D1 2.0000000 sec  
D11 0.0300000 sec  
TD0 1

===== CHANNEL f1 =====  
NUC1 13C  
P1 10.00 usec  
PL1 3.20 dB  
PL1W 36.06793213 W  
SFO1 75.4752953 MHz

===== CHANNEL f2 =====  
CPDPRG2 waltz16  
NUC2 1H  
PCPD2 80.00 usec  
PL2 3.20 dB  
PL12 19.50 dB  
PL2W 12.02264404 W  
PL12W 0.28183830 W  
SFO2 300.1312005 MHz  
SI 32768  
SF 75.4677490 MHz  
WDW no  
SSB 0  
LB 0.00 Hz  
GB 0  
PC 1.40

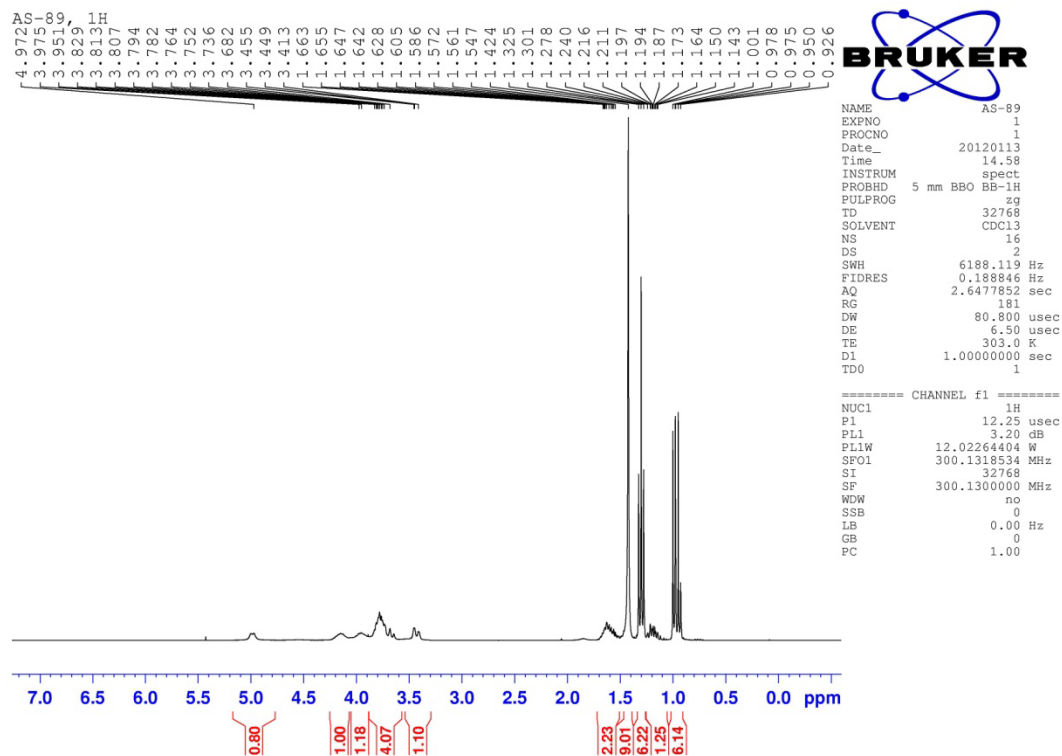

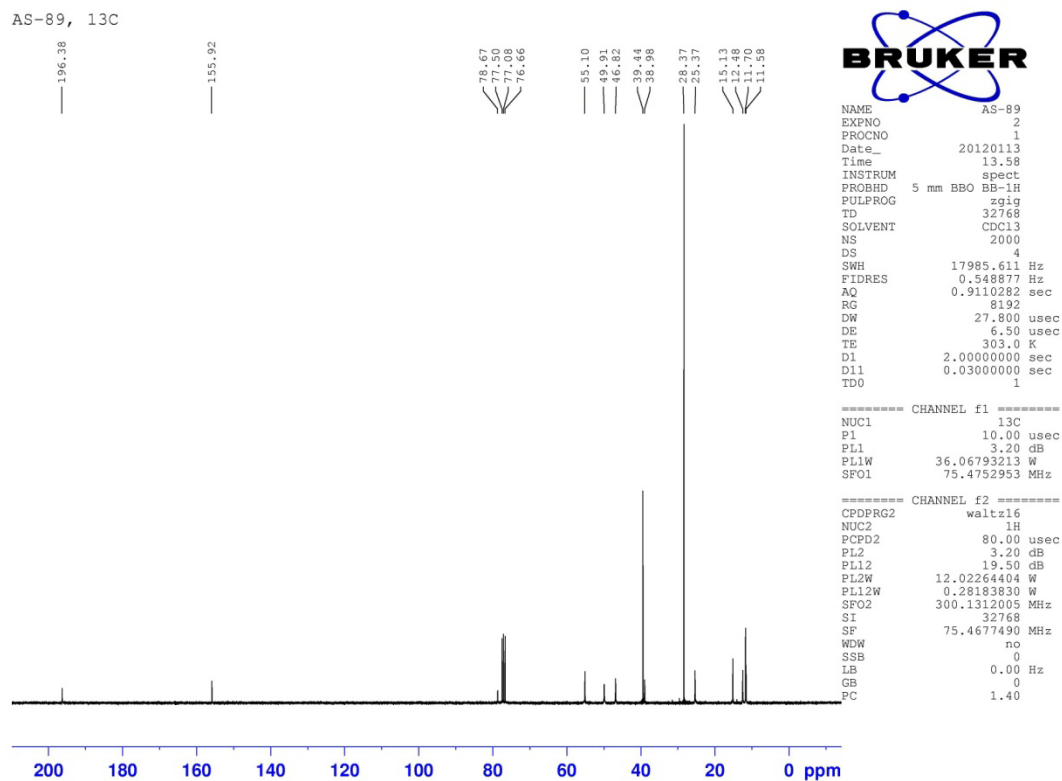

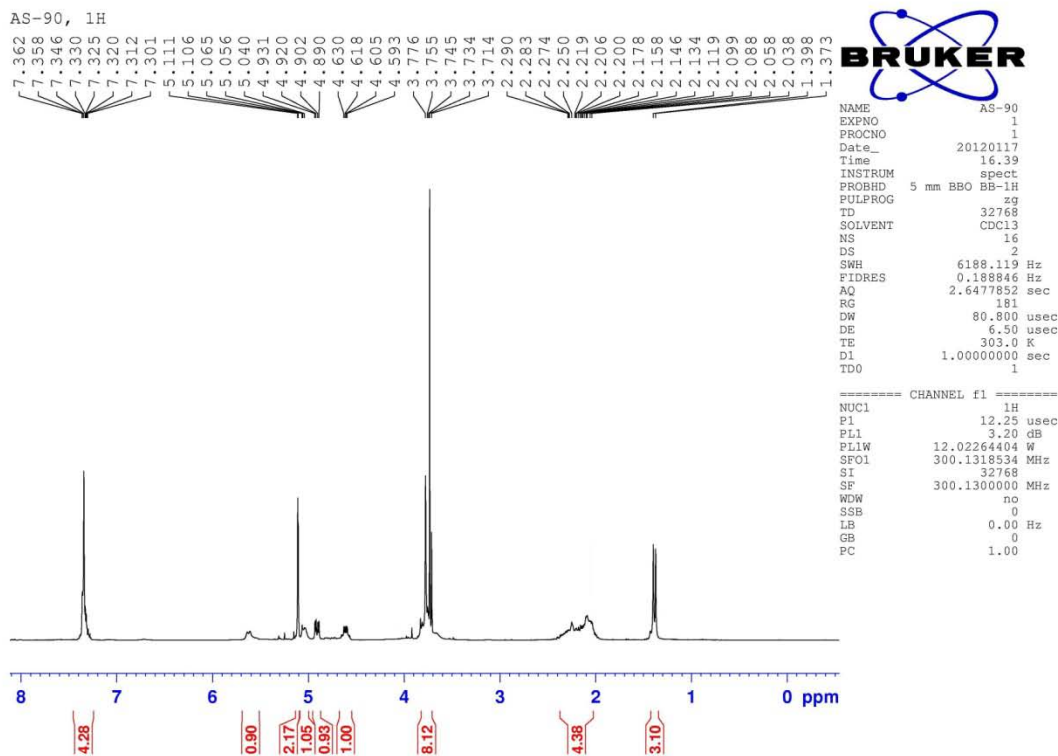

AS-90, <sup>13</sup>C

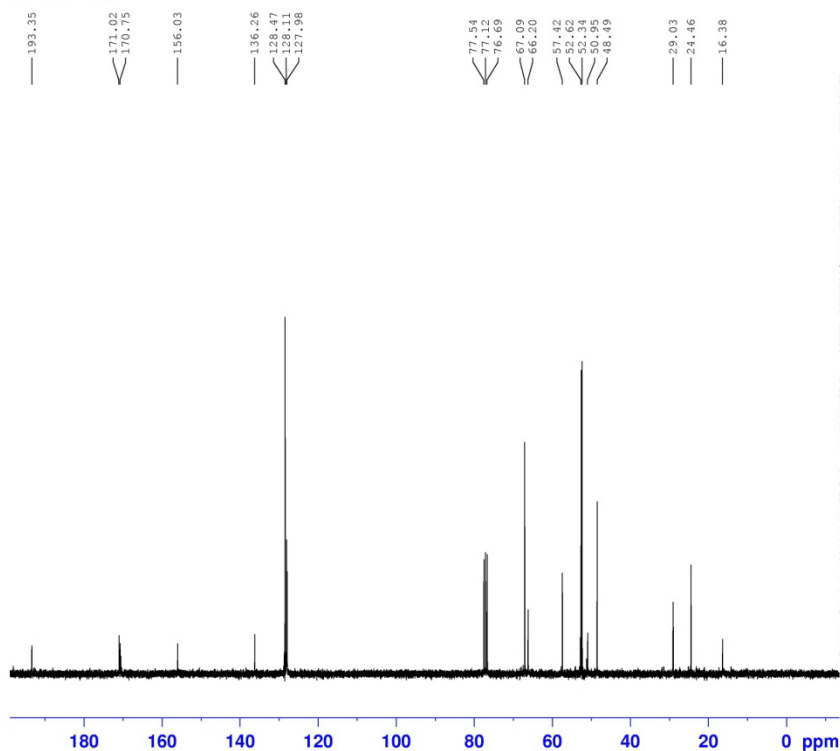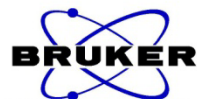

NAME AS-90  
EXPNO 2  
PROCNO 1  
Date\_ 20120117  
Time\_ 18.03  
INSTRUM spect  
PROBHD 5 mm BBO BB-1H  
PULPROG zgig  
TD 32768  
SOLVENT CDCl3  
NS 1100  
DS 4  
SWH 17985.611 Hz  
FIDRES 0.548877 Hz  
AQ 0.9110282 sec  
RG 8192  
DW 27.800 usec  
DE 6.50 usec  
TE 303.0 K  
D1 2.00000000 sec  
D11 0.03000000 sec  
TD0 1

===== CHANNEL f1 =====  
NUC1 <sup>13</sup>C  
P1 10.00 usec  
PL1 3.20 dB  
PL1W 36.06793213 W  
SFO1 75.4752953 MHz

===== CHANNEL f2 =====  
CPDPRG2 waltz16  
NUC2 <sup>1</sup>H  
PCPD2 80.00 usec  
PL2 3.20 dB  
PL12 19.50 dB  
PL2W 12.02264404 W  
PL12W 0.28183830 W  
SFO2 300.1312005 MHz  
SI 32768  
SF 75.4677490 MHz  
WDW no  
SSB 0  
LB 0.00 Hz  
GB 0  
PC 1.40

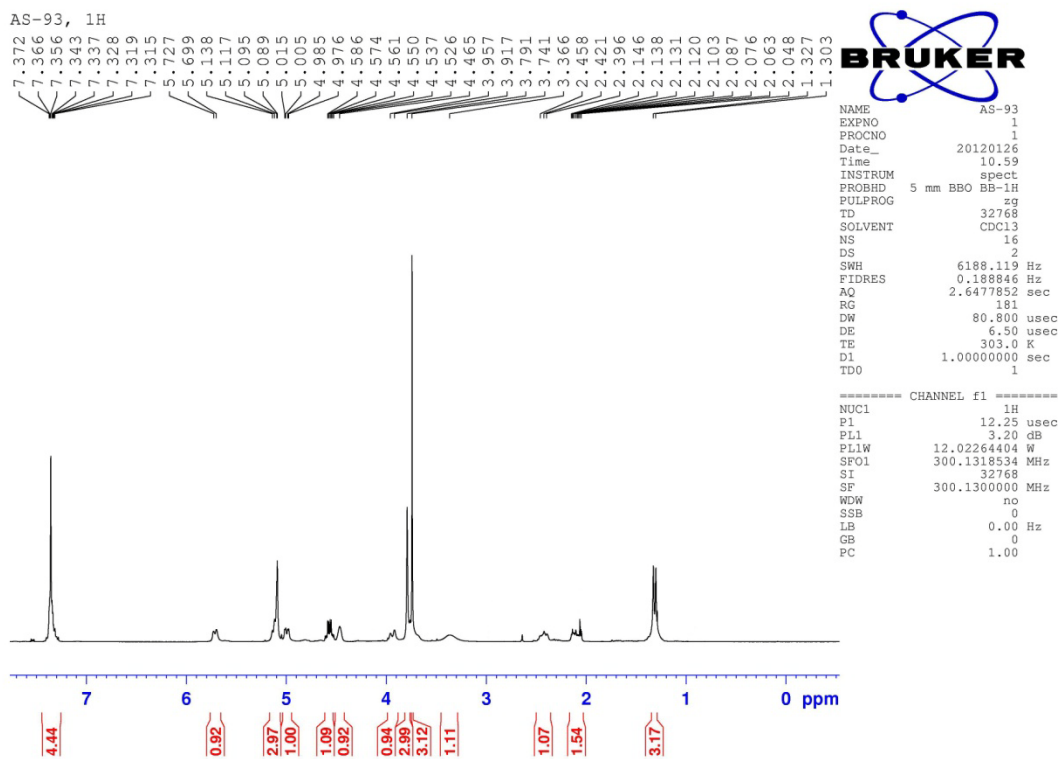

AS-93, <sup>13</sup>C

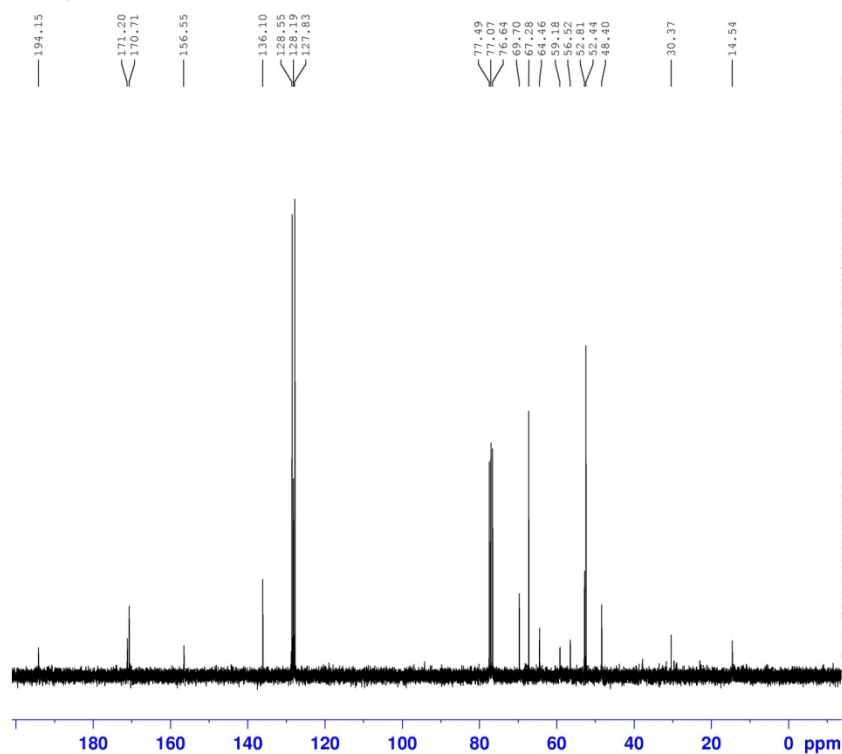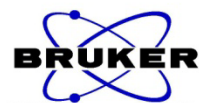

```
NAME AS-93
EXPNO 2
PROCNO 1
Date_ 20120126
Time 12.08
INSTRUM spect
PROBHD 5 mm BBO BB-1H
PULPROG zgig
TD 32768
SOLVENT CDCl3
NS 700
DS 4
SWH 17985.611 Hz
FIDRES 0.548877 Hz
AQ 0.9110282 sec
RG 8192
DW 27.800 usec
DE 10.00 usec
TE 303.0 K
D1 2.00000000 sec
D11 0.03000000 sec
TD0 1

===== CHANNEL f1 =====
NUC1 13C
P1 10.00 usec
PL1 3.20 dB
PL1W 36.06793213 W
SFO1 75.4752953 MHz

===== CHANNEL f2 =====
CPDPRG2 waltz16
NUC2 1H
PCPD2 80.00 usec
PL2 3.20 dB
PL12 19.50 dB
PL2W 12.02264404 W
PL12W 0.28183830 W
SFO2 300.1312005 MHz
SI 32768
SF 75.4677490 MHz
WDW no
SSB 0
LB 0.00 Hz
GB 0
PC 1.40
```

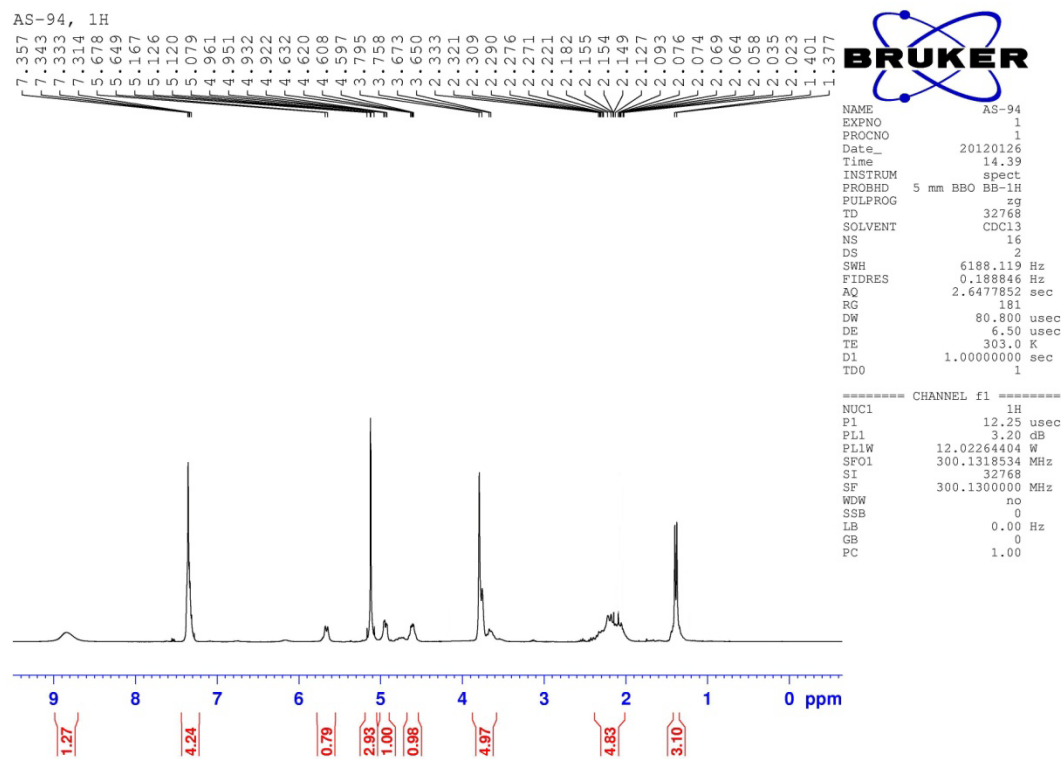

AS-94, <sup>13</sup>C

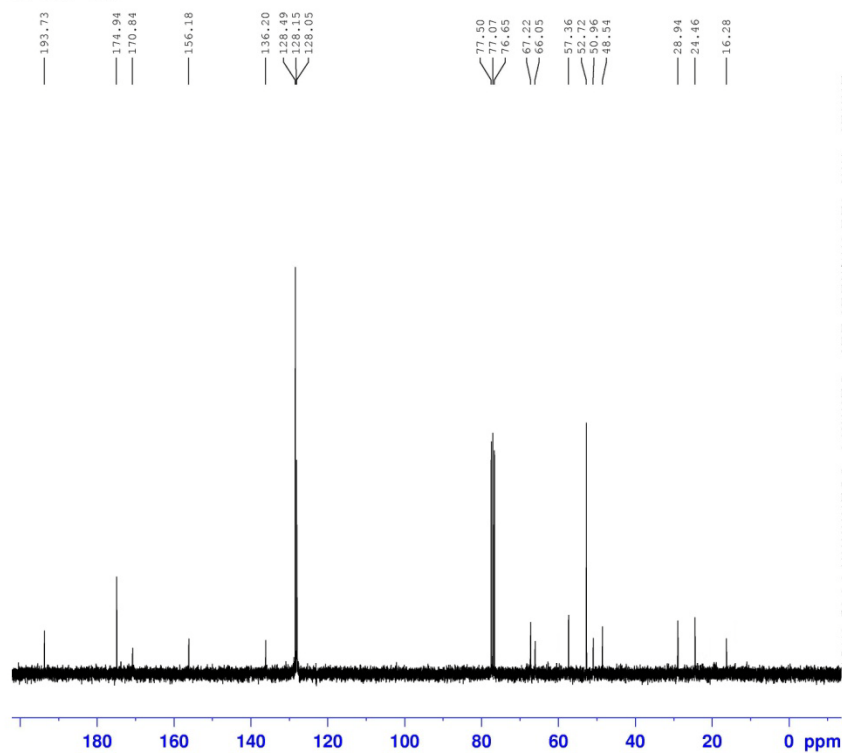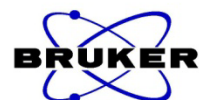

NAME AS-94  
EXPNO 2  
PROCNO 1  
Date\_ 20120126  
Time 15.40  
INSTRUM spect  
PROBHD 5 mm BBO BB-1H  
PULPROG zgig  
TD 32768  
SOLVENT CDCl3  
NS 700  
DS 4  
SWH 17985.611 Hz  
FIDRES 0.548877 Hz  
AQ 0.9110282 sec  
RG 8192  
DW 27.800 usec  
DE 10.00 usec  
TE 303.0 K  
D1 2.0000000 sec  
D11 0.0300000 sec  
TD0 1

===== CHANNEL f1 =====  
NUC1 <sup>13</sup>C  
P1 10.00 usec  
PL1 3.20 dB  
PL1W 36.06793213 W  
SFO1 75.4752953 MHz

===== CHANNEL f2 =====  
CPDPRG2 waltz16  
NUC2 <sup>1</sup>H  
PCPD2 80.00 usec  
PL2 3.20 dB  
PL12 19.50 dB  
PL2W 12.02264404 W  
PL12W 0.28183830 W  
SFO2 300.1312005 MHz  
SI 32768  
SF 75.4677490 MHz  
WDW no  
SSB 0  
LB 0.00 Hz  
GB 0  
PC 1.40

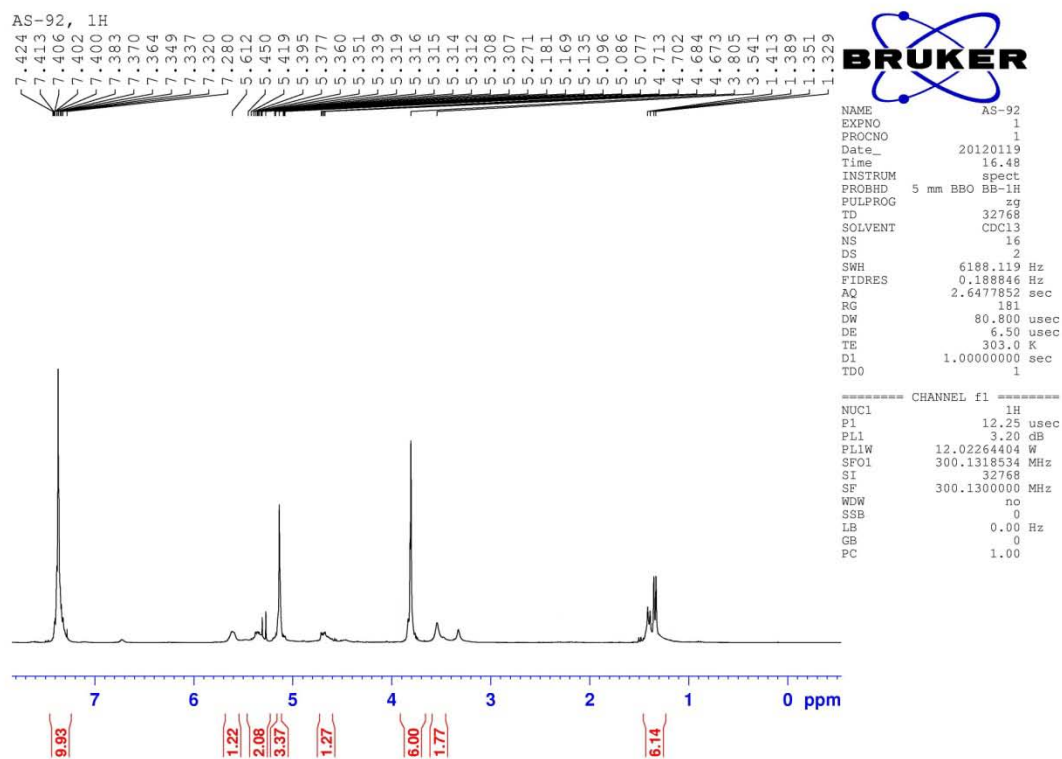

AS-92, <sup>13</sup>C

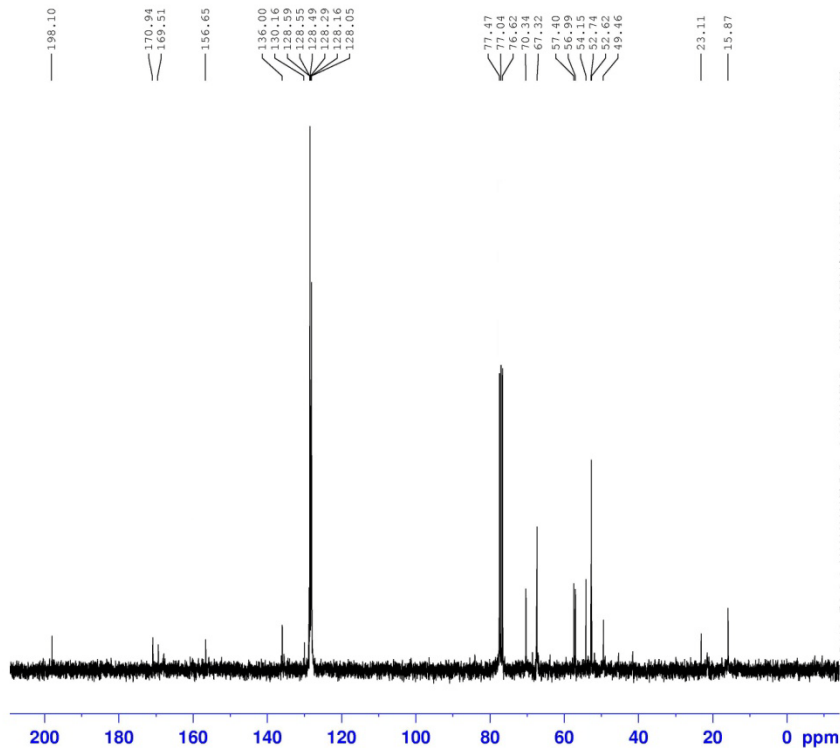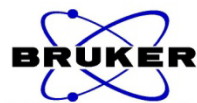

NAME AS-92  
EXPNO 2  
PROCNO 1  
Date\_ 20120119  
Time 18.26  
INSTRUM spect  
PROBHD 5 mm BBO BB-1H  
PULPROG zgig  
TD 32768  
SOLVENT CDCl3  
NS 1024  
DS 4  
SWH 17985.611 Hz  
FIDRES 0.548877 Hz  
AQ 0.9110282 sec  
RG 8192  
DW 27.800 usec  
DE 6.50 usec  
TE 303.0 K  
D1 2.00000000 sec  
D11 0.03000000 sec  
TD0 1

===== CHANNEL f1 =====  
NUC1 <sup>13</sup>C  
P1 10.00 usec  
PL1 3.20 dB  
PL1W 36.06793213 W  
SFO1 75.4752953 MHz

===== CHANNEL f2 =====  
CPDPRG2 waltz16  
NUC2 <sup>1</sup>H  
PCPD2 80.00 usec  
PL2 3.20 dB  
PL12 19.50 dB  
PL2W 12.02264404 W  
PL12W 0.28183830 W  
SFO2 300.1312005 MHz  
SI 32768  
SF 75.4677490 MHz  
WDW EM  
SSB 0  
LB 1.00 Hz  
GB 0  
PC 1.40

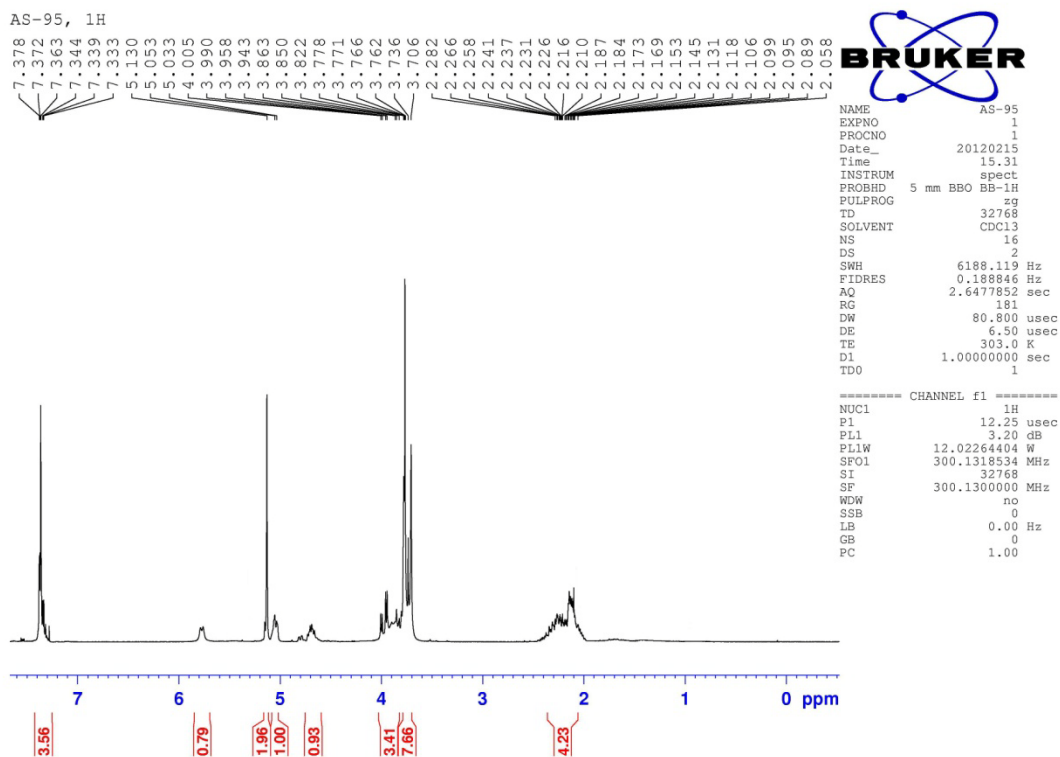

AS-95, <sup>13</sup>C

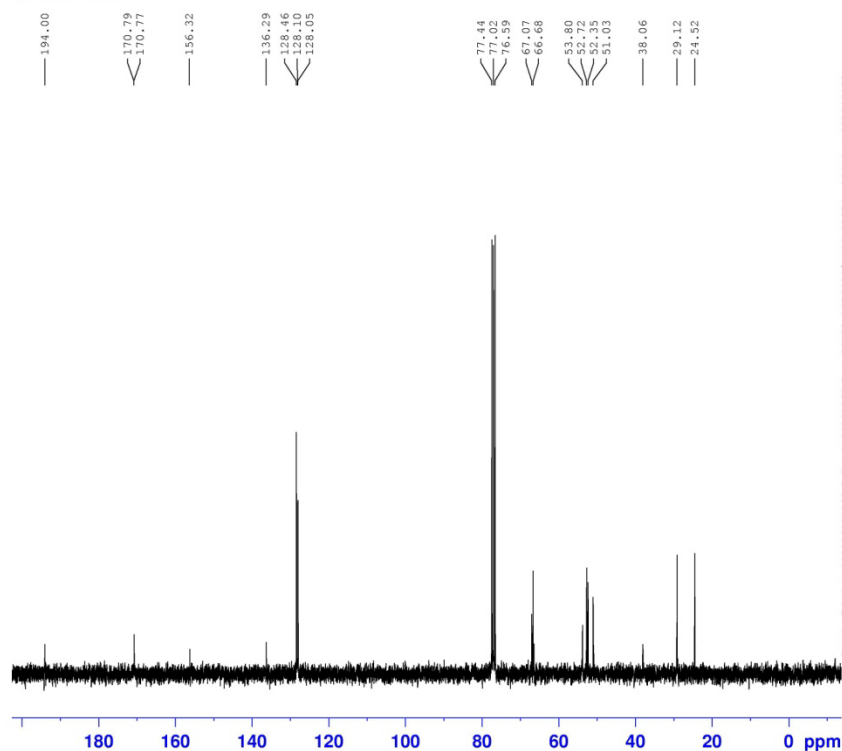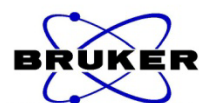

NAME AS-95  
EXPNO 2  
PROCNO 1  
Date\_ 20120215  
Time 16.34  
INSTRUM spect  
PROBHD 5 mm BBO BB-1H  
PULPROG zgig  
TD 32768  
SOLVENT CDCl3  
NS 700  
DS 4  
SWH 17985.611 Hz  
FIDRES 0.548877 Hz  
AQ 0.9110282 sec  
RG 8192  
DW 27.800 usec  
DE 10.00 usec  
TE 303.1 K  
D1 2.0000000 sec  
D11 0.0300000 sec  
TD0 1

===== CHANNEL f1 =====  
NUC1 <sup>13</sup>C  
P1 10.00 usec  
PL1 3.20 dB  
PL1W 36.06793213 W  
SFO1 75.4752953 MHz

===== CHANNEL f2 =====  
CPOPRG2 waltz16  
NUC2 <sup>1</sup>H  
PCPD2 80.00 usec  
PL2 3.20 dB  
PL12 19.50 dB  
PL2W 12.02264404 W  
PL12W 0.28183830 W  
SFO2 300.1312005 MHz  
SI 32768  
SF 75.4677490 MHz  
WDW EM  
SSB 0  
LB 1.00 Hz  
GB 0  
PC 1.40

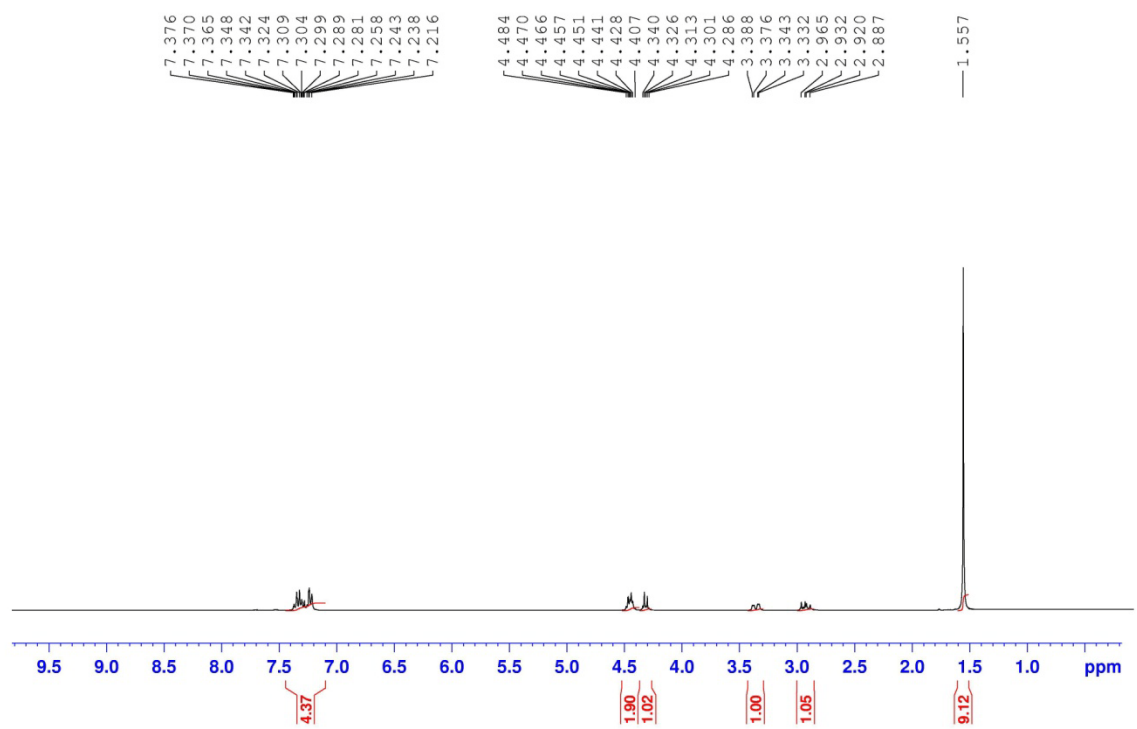

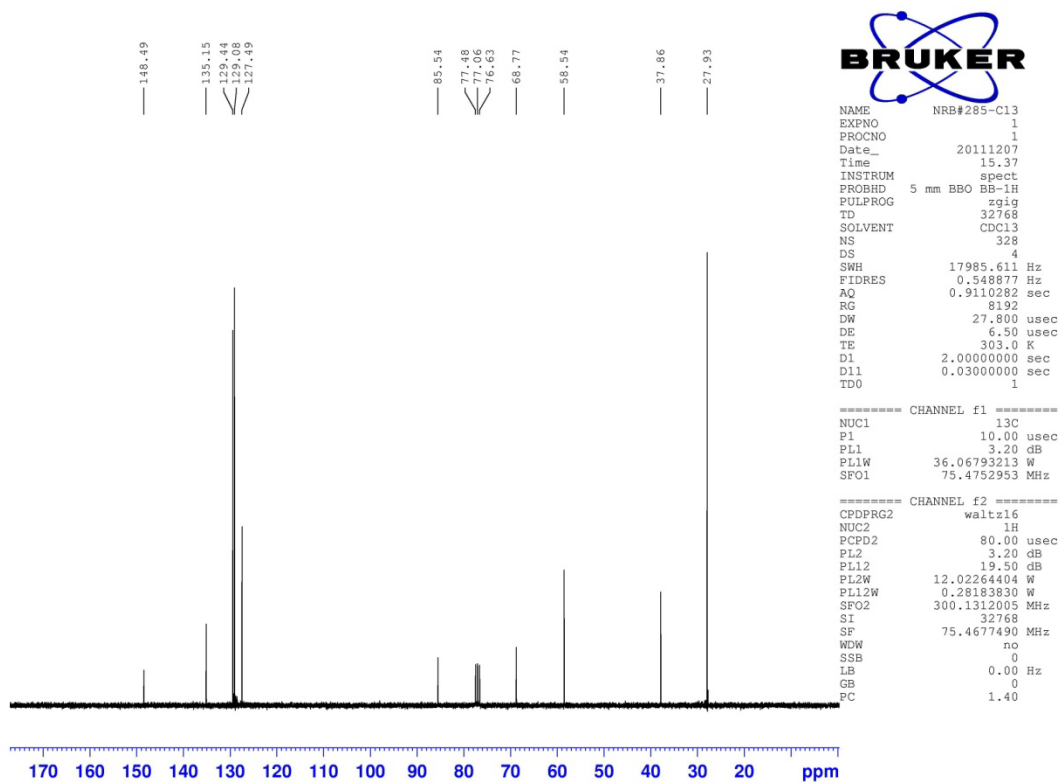

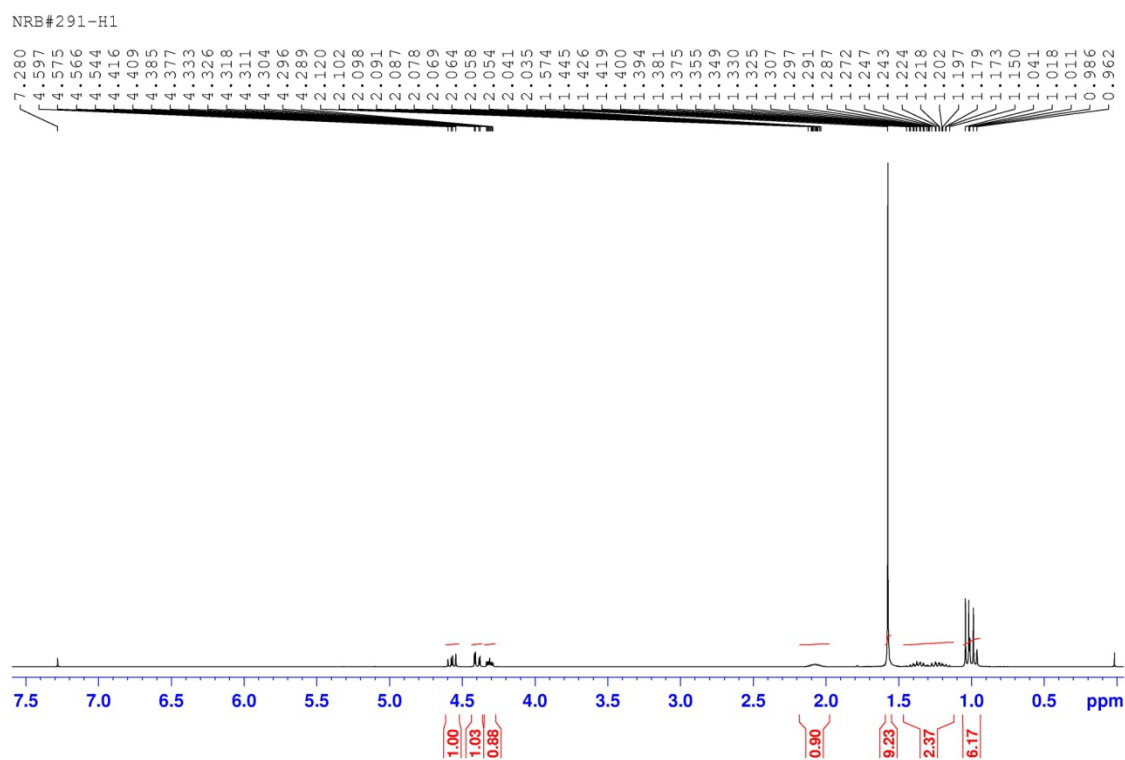

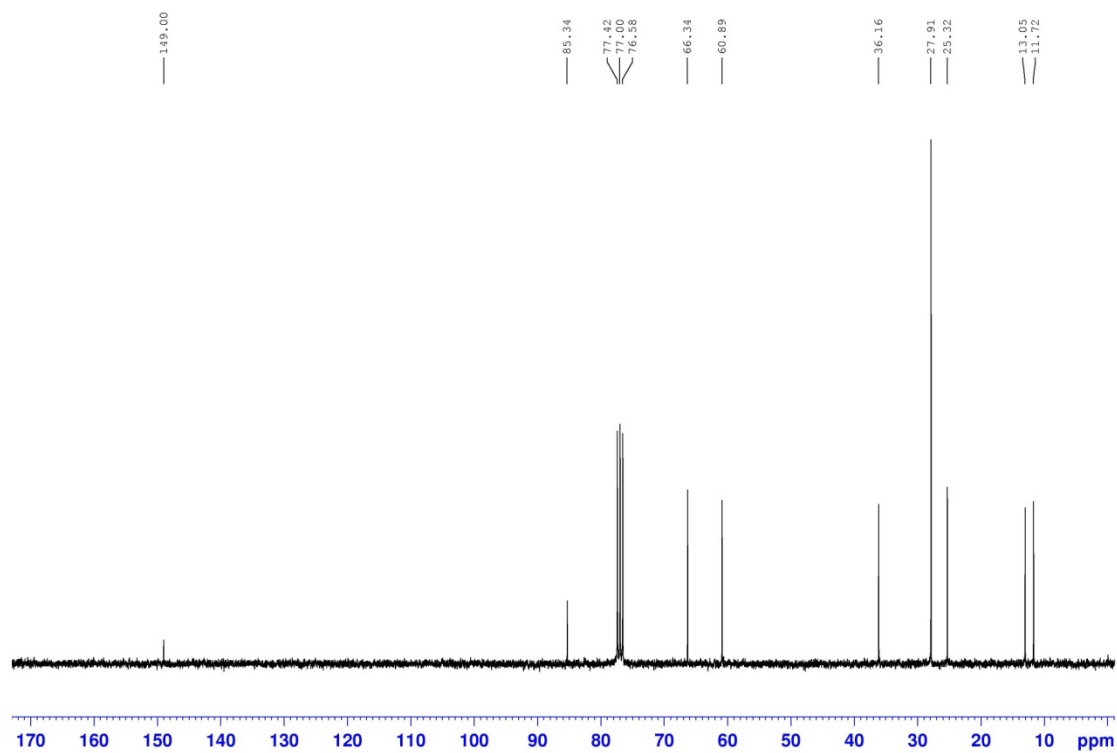

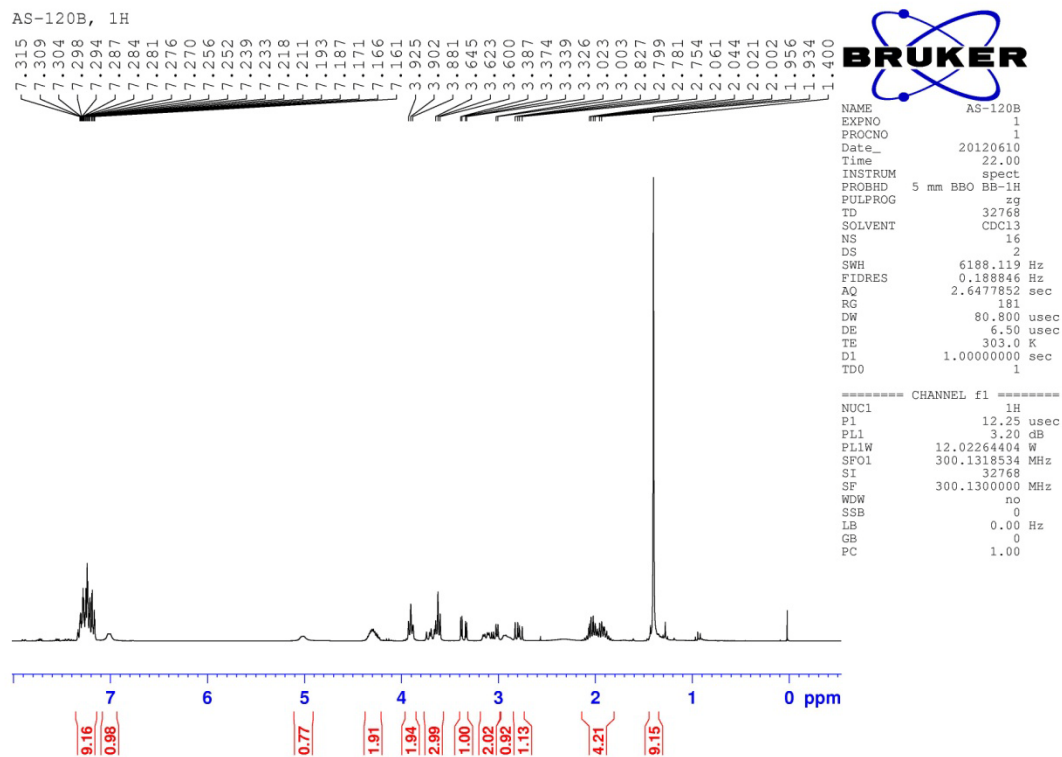

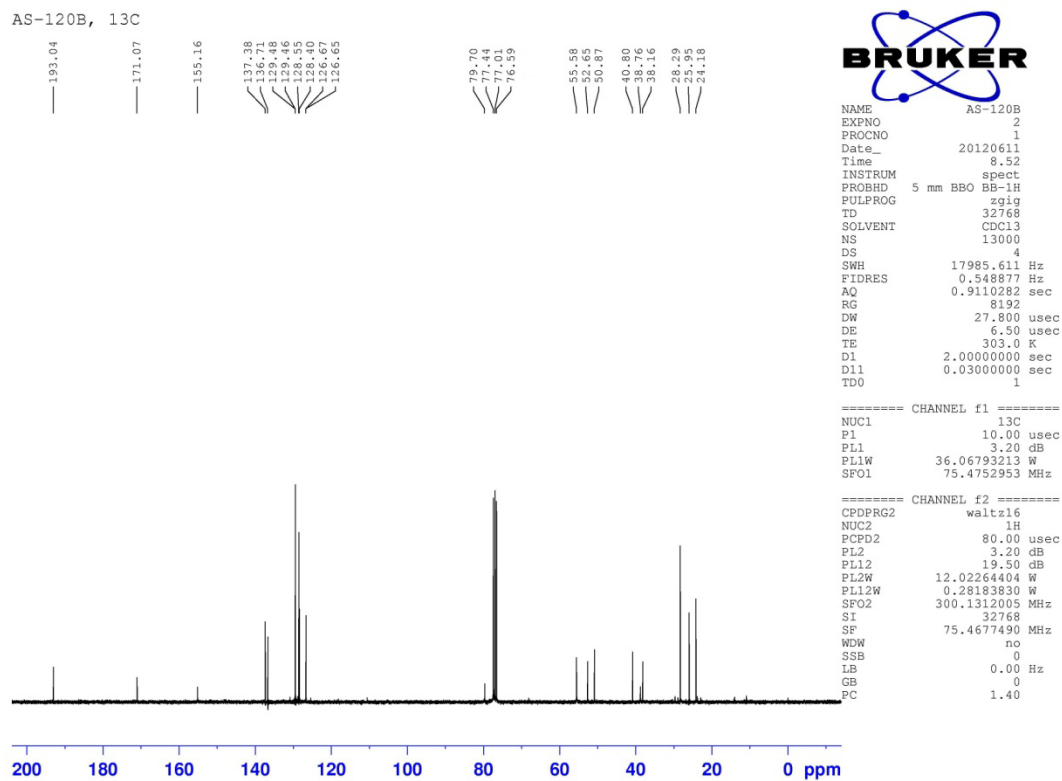

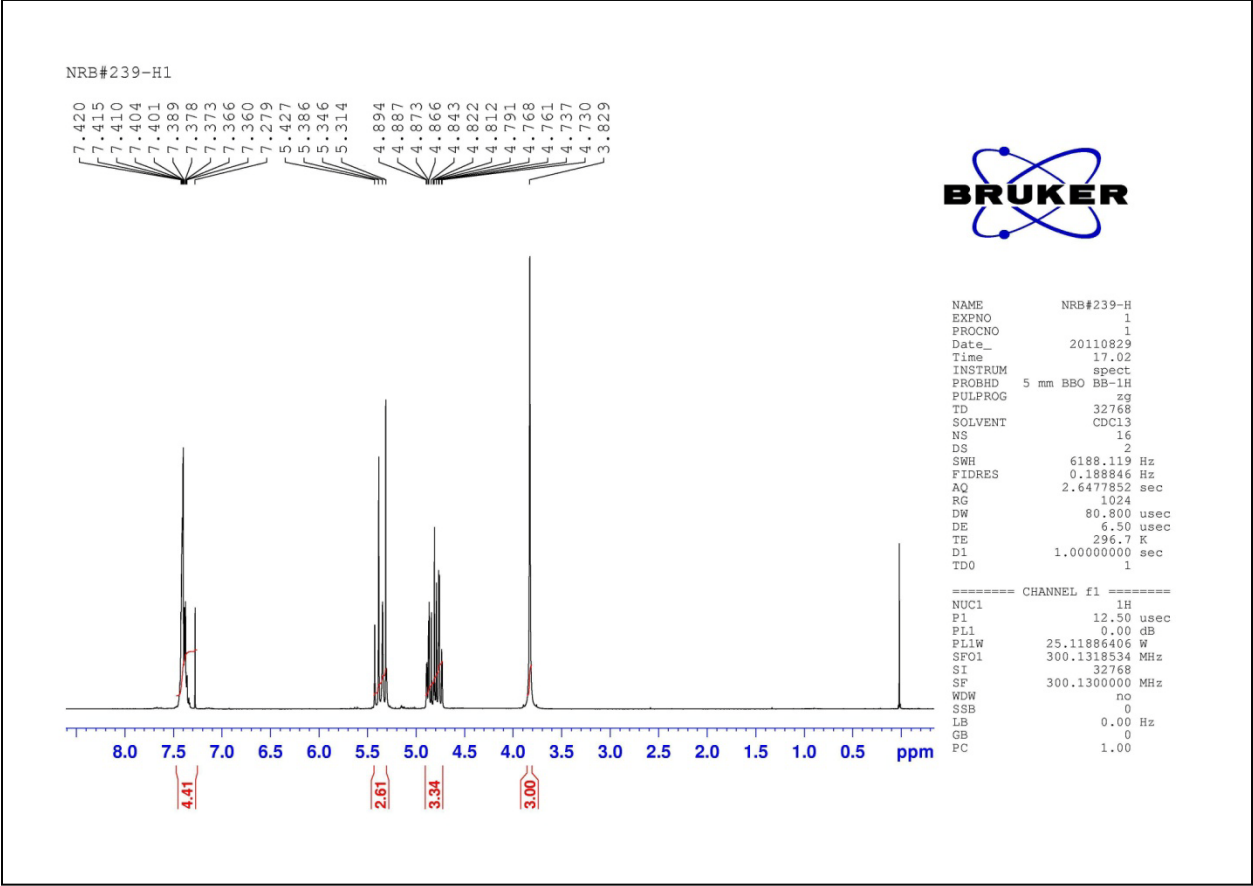

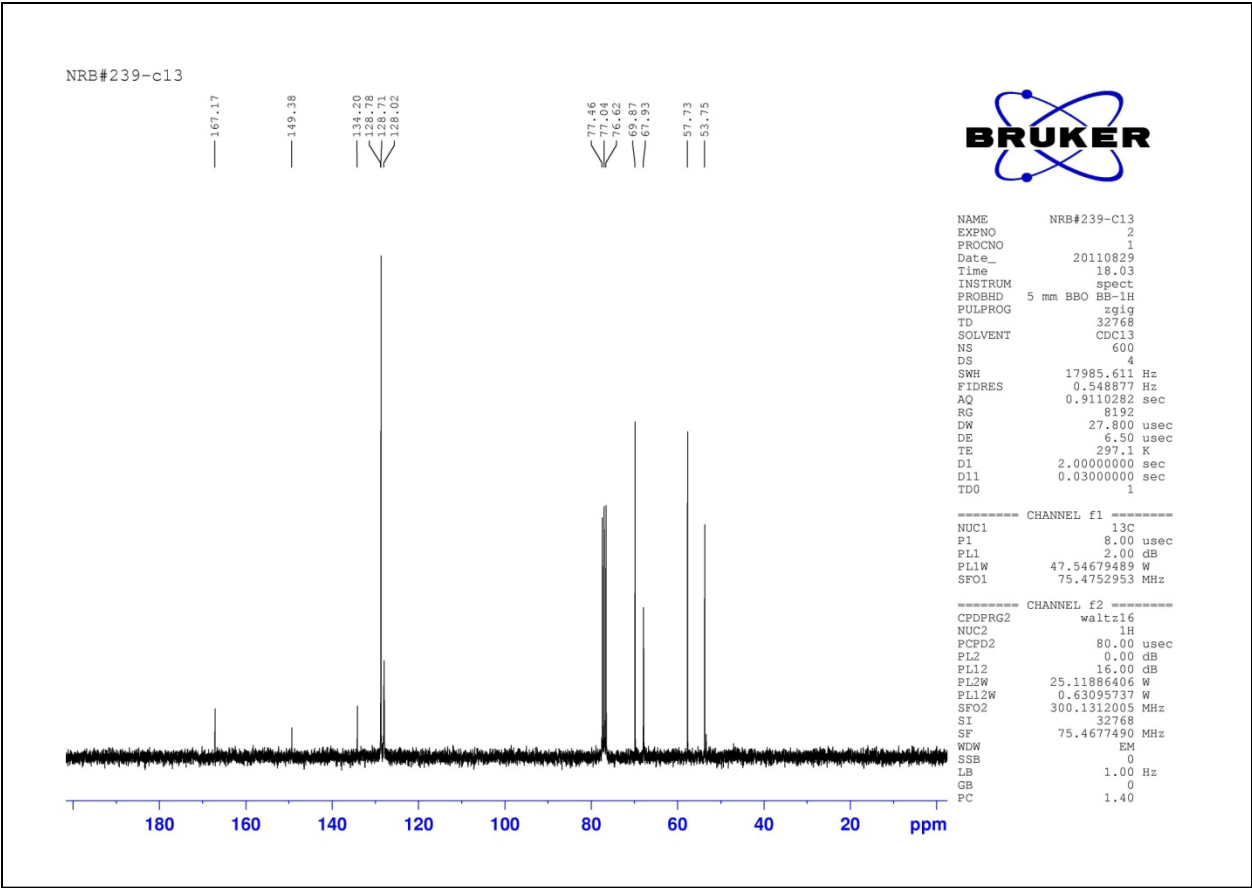

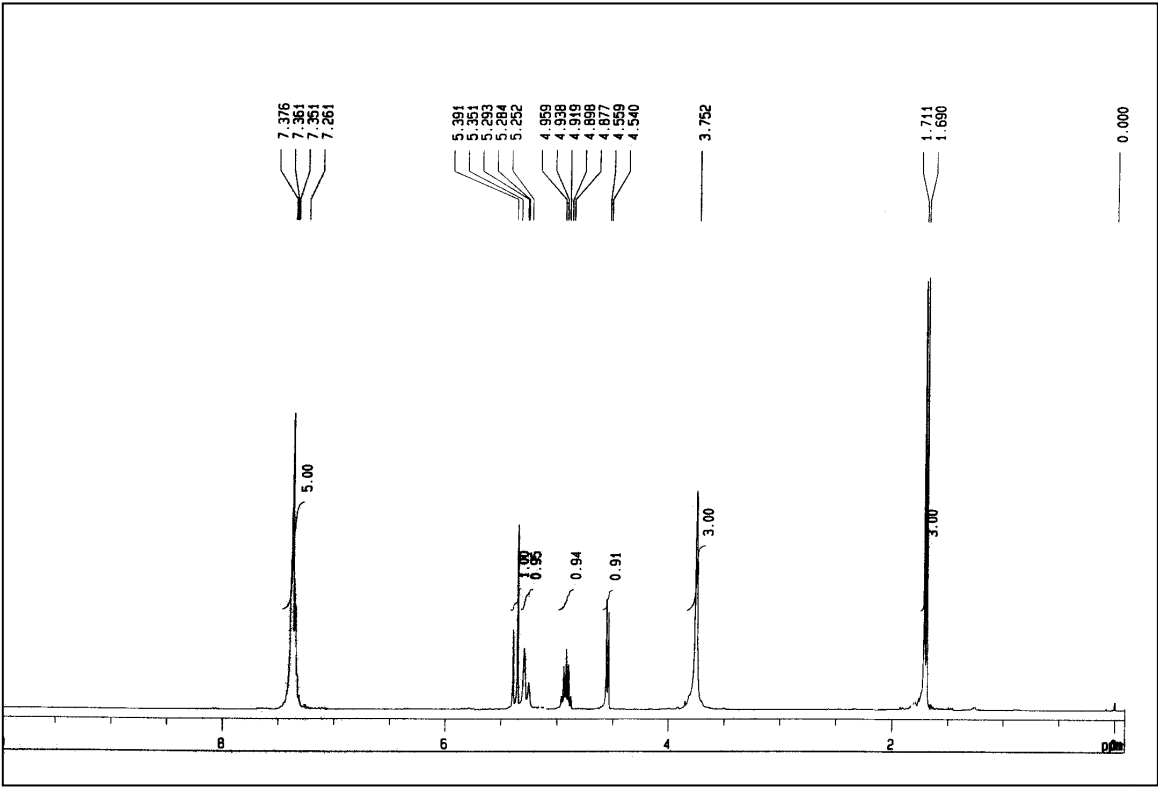

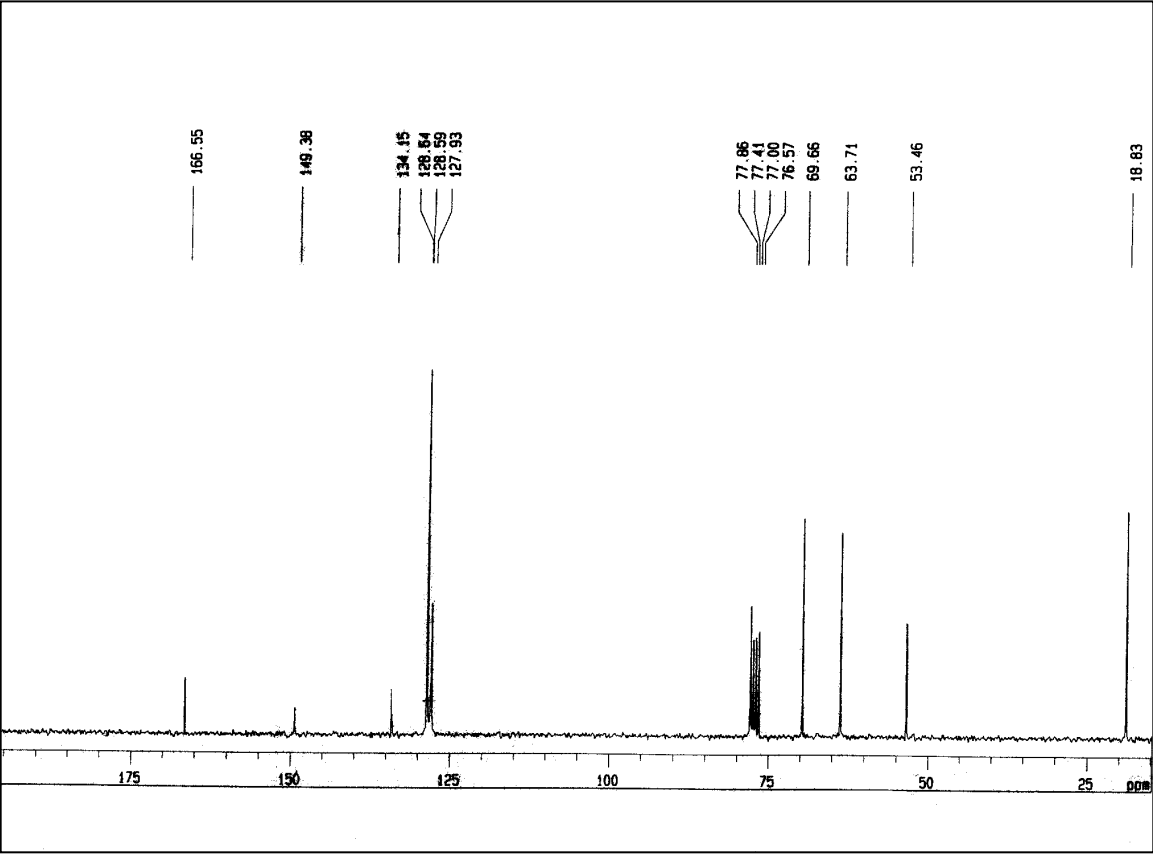

Supplement: c2cc32894a.pdf [file c2cc32894a.pdf]
